# Supplementary material for: An Advanced Systems Pharmacology Strategy Reveals AKR1B1, MMP2, PTGER3 as Key Genes in the Competing Endogenous RNA Network of Compound Kushen Injection Treating Gastric Carcinoma by Integrated Bioinformatics and Experimental Verification
Source: Front Cell Dev Biol. 2021 Sep 27;9:742421. doi: 10.3389/fcell.2021.742421 (PMC8502965; doi:10.3389/fcell.2021.742421)
Supplement: Supplementary Table 3 — Blue network nodes in WGCNA. [file Table_3.xlsx]

## Sheet: Table S3. Blue network nodes in
fromNode	toNode	weight	direction	fromAltName	toAltName
LTF	FCRLA	0.107558	undirected	protein_coding	protein_coding
LTF	CD79B	0.11557	undirected	protein_coding	protein_coding
FDCSP	CR2	0.11425	undirected	protein_coding	protein_coding
FDCSP	MS4A1	0.151844	undirected	protein_coding	protein_coding
FDCSP	CCL19	0.110076	undirected	protein_coding	protein_coding
FDCSP	BLK	0.115829	undirected	protein_coding	protein_coding
FDCSP	FCRLA	0.156321	undirected	protein_coding	protein_coding
FDCSP	FCRL3	0.124127	undirected	protein_coding	protein_coding
FDCSP	CD22	0.159066	undirected	protein_coding	protein_coding
FDCSP	TLR10	0.152783	undirected	protein_coding	protein_coding
FDCSP	CR1	0.11854	undirected	protein_coding	protein_coding
FDCSP	CCR7	0.126096	undirected	protein_coding	protein_coding
FDCSP	LINC00861	0.105952	undirected	protein_coding	long_non_coding
FDCSP	LY9	0.119507	undirected	protein_coding	protein_coding
FDCSP	AL365361.1	0.10436	undirected	protein_coding	long_non_coding
FDCSP	CD79B	0.173776	undirected	protein_coding	protein_coding
FDCSP	GAPT	0.123983	undirected	protein_coding	protein_coding
FDCSP	PRKCB	0.125486	undirected	protein_coding	protein_coding
FDCSP	NCF1B	0.104483	undirected	protein_coding	pseudogene
FDCSP	NAPSB	0.100825	undirected	protein_coding	pseudogene
FDCSP	WDFY4	0.114132	undirected	protein_coding	protein_coding
FDCSP	PTPRC	0.107109	undirected	protein_coding	protein_coding
FDCSP	CD48	0.116888	undirected	protein_coding	protein_coding
FDCSP	CD180	0.125673	undirected	protein_coding	protein_coding
FDCSP	TNFSF8	0.111392	undirected	protein_coding	protein_coding
FDCSP	ANKRD33B	0.119468	undirected	protein_coding	protein_coding
FDCSP	TESPA1	0.122282	undirected	protein_coding	protein_coding
FDCSP	CD37	0.142557	undirected	protein_coding	protein_coding
FDCSP	PPP1R16B	0.120114	undirected	protein_coding	protein_coding
FDCSP	BTK	0.123236	undirected	protein_coding	protein_coding
FDCSP	SCIMP	0.114009	undirected	protein_coding	protein_coding
FDCSP	TAGAP	0.103514	undirected	protein_coding	protein_coding
FDCSP	TRAF3IP3	0.129943	undirected	protein_coding	protein_coding
FDCSP	SASH3	0.12759	undirected	protein_coding	protein_coding
FDCSP	IKZF1	0.125873	undirected	protein_coding	protein_coding
FDCSP	IL16	0.153841	undirected	protein_coding	protein_coding
FDCSP	GIMAP5	0.105017	undirected	protein_coding	protein_coding
FDCSP	DOCK2	0.102898	undirected	protein_coding	protein_coding
FDCSP	KLHL6	0.117041	undirected	protein_coding	protein_coding
FDCSP	NCKAP1L	0.109413	undirected	protein_coding	protein_coding
FDCSP	MAP4K1	0.115623	undirected	protein_coding	protein_coding
FDCSP	EVI2B	0.110199	undirected	protein_coding	protein_coding
FDCSP	S1PR4	0.100162	undirected	protein_coding	protein_coding
FDCSP	P2RY8	0.126625	undirected	protein_coding	protein_coding
FDCSP	RASGRP2	0.13757	undirected	protein_coding	protein_coding
FDCSP	RHOH	0.135684	undirected	protein_coding	protein_coding
FDCSP	TMEM156	0.111106	undirected	protein_coding	protein_coding
FDCSP	FCMR	0.145465	undirected	protein_coding	protein_coding
FDCSP	TBC1D10C	0.100222	undirected	protein_coding	protein_coding
FDCSP	WAS	0.103771	undirected	protein_coding	protein_coding
FDCSP	CD1D	0.125913	undirected	protein_coding	protein_coding
FDCSP	ARHGAP9	0.105123	undirected	protein_coding	protein_coding
FDCSP	HCLS1	0.10065	undirected	protein_coding	protein_coding
FDCSP	RCSD1	0.137516	undirected	protein_coding	protein_coding
FDCSP	ARHGAP15	0.115923	undirected	protein_coding	protein_coding
FDCSP	RASAL3	0.114144	undirected	protein_coding	protein_coding
FDCSP	ARHGEF6	0.100557	undirected	protein_coding	protein_coding
FDCSP	RIPOR2	0.101993	undirected	protein_coding	protein_coding
FDCSP	FGD2	0.105444	undirected	protein_coding	protein_coding
FDCSP	ARHGAP25	0.116085	undirected	protein_coding	protein_coding
FDCSP	POU2F2	0.110734	undirected	protein_coding	protein_coding
FDCSP	JAK3	0.108221	undirected	protein_coding	protein_coding
FDCSP	WIPF1	0.103738	undirected	protein_coding	protein_coding
FDCSP	HVCN1	0.110983	undirected	protein_coding	protein_coding
FDCSP	ACAP1	0.112752	undirected	protein_coding	protein_coding
FDCSP	FLI1	0.106126	undirected	protein_coding	protein_coding
FDCSP	ANKRD44	0.119223	undirected	protein_coding	protein_coding
CR2	MS4A1	0.165295	undirected	protein_coding	protein_coding
CR2	CCL19	0.11431	undirected	protein_coding	protein_coding
CR2	PAX5	0.11305	undirected	protein_coding	protein_coding
CR2	BLK	0.127827	undirected	protein_coding	protein_coding
CR2	CXCL13	0.106528	undirected	protein_coding	protein_coding
CR2	FCRLA	0.177683	undirected	protein_coding	protein_coding
CR2	FCRL3	0.153265	undirected	protein_coding	protein_coding
CR2	KCNA3	0.11881	undirected	protein_coding	protein_coding
CR2	CD22	0.180959	undirected	protein_coding	protein_coding
CR2	TLR10	0.166284	undirected	protein_coding	protein_coding
CR2	CR1	0.152291	undirected	protein_coding	protein_coding
CR2	CD19	0.12543	undirected	protein_coding	protein_coding
CR2	P2RY10	0.132371	undirected	protein_coding	protein_coding
CR2	CCR7	0.150034	undirected	protein_coding	protein_coding
CR2	LINC00861	0.133214	undirected	protein_coding	long_non_coding
CR2	LY9	0.15638	undirected	protein_coding	protein_coding
CR2	AL365361.1	0.130704	undirected	protein_coding	long_non_coding
CR2	CD79B	0.202619	undirected	protein_coding	protein_coding
CR2	GAPT	0.128401	undirected	protein_coding	protein_coding
CR2	ZNF831	0.125595	undirected	protein_coding	protein_coding
CR2	LAX1	0.104608	undirected	protein_coding	protein_coding
CR2	CD27	0.127174	undirected	protein_coding	protein_coding
CR2	PRKCB	0.139091	undirected	protein_coding	protein_coding
CR2	NCF1B	0.137595	undirected	protein_coding	pseudogene
CR2	NAPSB	0.120147	undirected	protein_coding	pseudogene
CR2	SLAMF6	0.120422	undirected	protein_coding	protein_coding
CR2	WDFY4	0.156041	undirected	protein_coding	protein_coding
CR2	CCR4	0.107489	undirected	protein_coding	protein_coding
CR2	PIK3CG	0.121087	undirected	protein_coding	protein_coding
CR2	ITK	0.120753	undirected	protein_coding	protein_coding
CR2	NCF1	0.127938	undirected	protein_coding	protein_coding
CR2	PTPRC	0.151935	undirected	protein_coding	protein_coding
CR2	CD48	0.155393	undirected	protein_coding	protein_coding
CR2	CD28	0.129428	undirected	protein_coding	protein_coding
CR2	GVINP1	0.139208	undirected	protein_coding	pseudogene
CR2	CSF2RB	0.120744	undirected	protein_coding	protein_coding
CR2	SELL	0.120353	undirected	protein_coding	protein_coding
CR2	CD180	0.165761	undirected	protein_coding	protein_coding
CR2	IL10RA	0.120624	undirected	protein_coding	protein_coding
CR2	TNFSF8	0.153873	undirected	protein_coding	protein_coding
CR2	ANKRD33B	0.139014	undirected	protein_coding	protein_coding
CR2	ITGAL	0.129249	undirected	protein_coding	protein_coding
CR2	TESPA1	0.154435	undirected	protein_coding	protein_coding
CR2	CD37	0.1755	undirected	protein_coding	protein_coding
CR2	PPP1R16B	0.156626	undirected	protein_coding	protein_coding
CR2	BTK	0.167133	undirected	protein_coding	protein_coding
CR2	IL21R	0.108246	undirected	protein_coding	protein_coding
CR2	CARMIL2	0.100131	undirected	protein_coding	protein_coding
CR2	CYSLTR1	0.105192	undirected	protein_coding	protein_coding
CR2	CD53	0.124096	undirected	protein_coding	protein_coding
CR2	ZAP70	0.110454	undirected	protein_coding	protein_coding
CR2	CD52	0.110166	undirected	protein_coding	protein_coding
CR2	SCIMP	0.156222	undirected	protein_coding	protein_coding
CR2	TAGAP	0.145011	undirected	protein_coding	protein_coding
CR2	TRAF3IP3	0.177999	undirected	protein_coding	protein_coding
CR2	SASH3	0.17866	undirected	protein_coding	protein_coding
CR2	IKZF1	0.1728	undirected	protein_coding	protein_coding
CR2	IL16	0.200294	undirected	protein_coding	protein_coding
CR2	GIMAP5	0.136623	undirected	protein_coding	protein_coding
CR2	DOCK2	0.149035	undirected	protein_coding	protein_coding
CR2	SP140	0.104173	undirected	protein_coding	protein_coding
CR2	SPN	0.100356	undirected	protein_coding	protein_coding
CR2	KLHL6	0.159604	undirected	protein_coding	protein_coding
CR2	NCKAP1L	0.154678	undirected	protein_coding	protein_coding
CR2	MAP4K1	0.160582	undirected	protein_coding	protein_coding
CR2	EVI2B	0.145963	undirected	protein_coding	protein_coding
CR2	S1PR4	0.130046	undirected	protein_coding	protein_coding
CR2	P2RY8	0.16432	undirected	protein_coding	protein_coding
CR2	LCP1	0.118478	undirected	protein_coding	protein_coding
CR2	RASGRP2	0.149029	undirected	protein_coding	protein_coding
CR2	RHOH	0.178883	undirected	protein_coding	protein_coding
CR2	PARP15	0.11002	undirected	protein_coding	protein_coding
CR2	SLA	0.112232	undirected	protein_coding	protein_coding
CR2	TMEM156	0.141745	undirected	protein_coding	protein_coding
CR2	FCMR	0.171056	undirected	protein_coding	protein_coding
CR2	TBC1D10C	0.138915	undirected	protein_coding	protein_coding
CR2	WAS	0.143042	undirected	protein_coding	protein_coding
CR2	SLAMF1	0.124161	undirected	protein_coding	protein_coding
CR2	DOCK10	0.117296	undirected	protein_coding	protein_coding
CR2	CD1D	0.151126	undirected	protein_coding	protein_coding
CR2	ARHGAP9	0.146951	undirected	protein_coding	protein_coding
CR2	CORO1A	0.13011	undirected	protein_coding	protein_coding
CR2	RASSF2	0.109067	undirected	protein_coding	protein_coding
CR2	HCLS1	0.138894	undirected	protein_coding	protein_coding
CR2	C10orf128	0.111342	undirected	protein_coding	protein_coding
CR2	RCSD1	0.18094	undirected	protein_coding	protein_coding
CR2	ARHGAP15	0.144272	undirected	protein_coding	protein_coding
CR2	CYTH4	0.102128	undirected	protein_coding	protein_coding
CR2	FAM49A	0.106723	undirected	protein_coding	protein_coding
CR2	LINC00926	0.104806	undirected	protein_coding	long_non_coding
CR2	RASAL3	0.158504	undirected	protein_coding	protein_coding
CR2	CLEC2D	0.124255	undirected	protein_coding	protein_coding
CR2	ARHGEF6	0.123875	undirected	protein_coding	protein_coding
CR2	RIPOR2	0.123427	undirected	protein_coding	protein_coding
CR2	TLR6	0.112557	undirected	protein_coding	protein_coding
CR2	MYO1G	0.12199	undirected	protein_coding	protein_coding
CR2	PARVG	0.120225	undirected	protein_coding	protein_coding
CR2	DOCK8	0.105461	undirected	protein_coding	protein_coding
CR2	NLRC3	0.124257	undirected	protein_coding	protein_coding
CR2	FGD2	0.139846	undirected	protein_coding	protein_coding
CR2	ARHGAP25	0.156923	undirected	protein_coding	protein_coding
CR2	PCED1B-AS1	0.120335	undirected	protein_coding	long_non_coding
CR2	BIN2	0.113014	undirected	protein_coding	protein_coding
CR2	ARHGAP30	0.102644	undirected	protein_coding	protein_coding
CR2	POU2F2	0.125818	undirected	protein_coding	protein_coding
CR2	JAK3	0.153957	undirected	protein_coding	protein_coding
CR2	2021-09-01	0.117169	undirected	protein_coding	protein_coding
CR2	WIPF1	0.128102	undirected	protein_coding	protein_coding
CR2	HVCN1	0.138264	undirected	protein_coding	protein_coding
CR2	ACAP1	0.144377	undirected	protein_coding	protein_coding
CR2	FLI1	0.133736	undirected	protein_coding	protein_coding
CR2	ANKRD44	0.147894	undirected	protein_coding	protein_coding
CR2	ARHGDIB	0.101154	undirected	protein_coding	protein_coding
CR2	FMNL1	0.123128	undirected	protein_coding	protein_coding
MS4A1	CCL19	0.129772	undirected	protein_coding	protein_coding
MS4A1	PAX5	0.174031	undirected	protein_coding	protein_coding
MS4A1	PLA2G2D	0.114273	undirected	protein_coding	protein_coding
MS4A1	BLK	0.164918	undirected	protein_coding	protein_coding
MS4A1	CXCL13	0.13648	undirected	protein_coding	protein_coding
MS4A1	FCRLA	0.198444	undirected	protein_coding	protein_coding
MS4A1	SPIB	0.158361	undirected	protein_coding	protein_coding
MS4A1	FCRL3	0.181359	undirected	protein_coding	protein_coding
MS4A1	KCNA3	0.16911	undirected	protein_coding	protein_coding
MS4A1	CD22	0.199217	undirected	protein_coding	protein_coding
MS4A1	CCR2	0.104896	undirected	protein_coding	protein_coding
MS4A1	GZMK	0.11197	undirected	protein_coding	protein_coding
MS4A1	TLR10	0.186612	undirected	protein_coding	protein_coding
MS4A1	CR1	0.183896	undirected	protein_coding	protein_coding
MS4A1	TRAT1	0.147654	undirected	protein_coding	protein_coding
MS4A1	CD19	0.147586	undirected	protein_coding	protein_coding
MS4A1	CD1C	0.125767	undirected	protein_coding	protein_coding
MS4A1	P2RY10	0.192706	undirected	protein_coding	protein_coding
MS4A1	CCR7	0.181968	undirected	protein_coding	protein_coding
MS4A1	LINC00861	0.179006	undirected	protein_coding	long_non_coding
MS4A1	SH2D1A	0.130181	undirected	protein_coding	protein_coding
MS4A1	LY9	0.209211	undirected	protein_coding	protein_coding
MS4A1	AL365361.1	0.178037	undirected	protein_coding	long_non_coding
MS4A1	NUGGC	0.109325	undirected	protein_coding	protein_coding
MS4A1	CD79B	0.234271	undirected	protein_coding	protein_coding
MS4A1	TLR7	0.106194	undirected	protein_coding	protein_coding
MS4A1	GAPT	0.148205	undirected	protein_coding	protein_coding
MS4A1	ZNF831	0.176717	undirected	protein_coding	protein_coding
MS4A1	ICAM3	0.117361	undirected	protein_coding	protein_coding
MS4A1	LAX1	0.147922	undirected	protein_coding	protein_coding
MS4A1	CD27	0.173929	undirected	protein_coding	protein_coding
MS4A1	TNFRSF13C	0.164824	undirected	protein_coding	protein_coding
MS4A1	P2RX5	0.122595	undirected	protein_coding	protein_coding
MS4A1	PRKCB	0.164726	undirected	protein_coding	protein_coding
MS4A1	NCF1B	0.185261	undirected	protein_coding	pseudogene
MS4A1	NAPSB	0.154505	undirected	protein_coding	pseudogene
MS4A1	SLAMF6	0.175756	undirected	protein_coding	protein_coding
MS4A1	WDFY4	0.202444	undirected	protein_coding	protein_coding
MS4A1	CCR4	0.146025	undirected	protein_coding	protein_coding
MS4A1	LTB	0.103608	undirected	protein_coding	protein_coding
MS4A1	TRBV28	0.128371	undirected	protein_coding	TR
MS4A1	PIK3CG	0.168458	undirected	protein_coding	protein_coding
MS4A1	ITK	0.185858	undirected	protein_coding	protein_coding
MS4A1	NCF1	0.181126	undirected	protein_coding	protein_coding
MS4A1	CD2	0.107267	undirected	protein_coding	protein_coding
MS4A1	TIGIT	0.111055	undirected	protein_coding	protein_coding
MS4A1	CD40LG	0.115671	undirected	protein_coding	protein_coding
MS4A1	SIT1	0.117238	undirected	protein_coding	protein_coding
MS4A1	MPEG1	0.127312	undirected	protein_coding	protein_coding
MS4A1	CD84	0.125097	undirected	protein_coding	protein_coding
MS4A1	BANK1	0.131176	undirected	protein_coding	protein_coding
MS4A1	CD3E	0.138457	undirected	protein_coding	protein_coding
MS4A1	PTPRC	0.2249	undirected	protein_coding	protein_coding
MS4A1	CD48	0.225547	undirected	protein_coding	protein_coding
MS4A1	CD28	0.174097	undirected	protein_coding	protein_coding
MS4A1	SIGLEC10	0.129803	undirected	protein_coding	protein_coding
MS4A1	GVINP1	0.19791	undirected	protein_coding	pseudogene
MS4A1	C16orf54	0.120165	undirected	protein_coding	protein_coding
MS4A1	PYHIN1	0.137067	undirected	protein_coding	protein_coding
MS4A1	CSF2RB	0.162279	undirected	protein_coding	protein_coding
MS4A1	SELL	0.153867	undirected	protein_coding	protein_coding
MS4A1	CD180	0.218174	undirected	protein_coding	protein_coding
MS4A1	IL10RA	0.179148	undirected	protein_coding	protein_coding
MS4A1	TNFSF8	0.213104	undirected	protein_coding	protein_coding
MS4A1	ADA2	0.104392	undirected	protein_coding	protein_coding
MS4A1	ANKRD33B	0.160542	undirected	protein_coding	protein_coding
MS4A1	ITGAL	0.197286	undirected	protein_coding	protein_coding
MS4A1	TESPA1	0.207946	undirected	protein_coding	protein_coding
MS4A1	CD37	0.231413	undirected	protein_coding	protein_coding
MS4A1	PPP1R16B	0.200056	undirected	protein_coding	protein_coding
MS4A1	CD96	0.113665	undirected	protein_coding	protein_coding
MS4A1	BTK	0.22532	undirected	protein_coding	protein_coding
MS4A1	IL21R	0.166754	undirected	protein_coding	protein_coding
MS4A1	CARMIL2	0.124162	undirected	protein_coding	protein_coding
MS4A1	CYSLTR1	0.126276	undirected	protein_coding	protein_coding
MS4A1	CD53	0.187939	undirected	protein_coding	protein_coding
MS4A1	ZAP70	0.169705	undirected	protein_coding	protein_coding
MS4A1	CD3D	0.110077	undirected	protein_coding	protein_coding
MS4A1	EBI3	0.105039	undirected	protein_coding	protein_coding
MS4A1	CD52	0.159776	undirected	protein_coding	protein_coding
MS4A1	LINC00426	0.133341	undirected	protein_coding	long_non_coding
MS4A1	LY86	0.109306	undirected	protein_coding	protein_coding
MS4A1	SCIMP	0.217884	undirected	protein_coding	protein_coding
MS4A1	TRBC2	0.135028	undirected	protein_coding	TR
MS4A1	TAGAP	0.202033	undirected	protein_coding	protein_coding
MS4A1	TRAF3IP3	0.252308	undirected	protein_coding	protein_coding
MS4A1	NCF1C	0.136102	undirected	protein_coding	pseudogene
MS4A1	SASH3	0.255193	undirected	protein_coding	protein_coding
MS4A1	IKZF1	0.246793	undirected	protein_coding	protein_coding
MS4A1	IL16	0.266616	undirected	protein_coding	protein_coding
MS4A1	GIMAP5	0.184529	undirected	protein_coding	protein_coding
MS4A1	DOCK2	0.21592	undirected	protein_coding	protein_coding
MS4A1	SP140	0.142755	undirected	protein_coding	protein_coding
MS4A1	CD69	0.127074	undirected	protein_coding	protein_coding
MS4A1	SPN	0.158916	undirected	protein_coding	protein_coding
MS4A1	KLHL6	0.215567	undirected	protein_coding	protein_coding
MS4A1	NCKAP1L	0.221144	undirected	protein_coding	protein_coding
MS4A1	MAP4K1	0.231508	undirected	protein_coding	protein_coding
MS4A1	TRG-AS1	0.121213	undirected	protein_coding	long_non_coding
MS4A1	TRAC	0.127354	undirected	protein_coding	TR
MS4A1	EVI2B	0.21192	undirected	protein_coding	protein_coding
MS4A1	S1PR4	0.178582	undirected	protein_coding	protein_coding
MS4A1	P2RY8	0.213923	undirected	protein_coding	protein_coding
MS4A1	LCP1	0.177184	undirected	protein_coding	protein_coding
MS4A1	RASGRP2	0.161588	undirected	protein_coding	protein_coding
MS4A1	RHOH	0.245178	undirected	protein_coding	protein_coding
MS4A1	PARP15	0.135991	undirected	protein_coding	protein_coding
MS4A1	SLA	0.169598	undirected	protein_coding	protein_coding
MS4A1	TMEM156	0.187644	undirected	protein_coding	protein_coding
MS4A1	CD3G	0.119374	undirected	protein_coding	protein_coding
MS4A1	PIK3R5	0.133209	undirected	protein_coding	protein_coding
MS4A1	LRMP	0.131318	undirected	protein_coding	protein_coding
MS4A1	GPR65	0.109254	undirected	protein_coding	protein_coding
MS4A1	ITGA4	0.123209	undirected	protein_coding	protein_coding
MS4A1	SNX20	0.130514	undirected	protein_coding	protein_coding
MS4A1	FCMR	0.197547	undirected	protein_coding	protein_coding
MS4A1	LILRB1	0.127959	undirected	protein_coding	protein_coding
MS4A1	TBC1D10C	0.20705	undirected	protein_coding	protein_coding
MS4A1	SAMSN1	0.102867	undirected	protein_coding	protein_coding
MS4A1	WAS	0.209952	undirected	protein_coding	protein_coding
MS4A1	SLAMF1	0.181446	undirected	protein_coding	protein_coding
MS4A1	PTPN7	0.132218	undirected	protein_coding	protein_coding
MS4A1	DOCK10	0.168863	undirected	protein_coding	protein_coding
MS4A1	CXorf21	0.11097	undirected	protein_coding	protein_coding
MS4A1	CD6	0.133764	undirected	protein_coding	protein_coding
MS4A1	CD1D	0.187676	undirected	protein_coding	protein_coding
MS4A1	ARHGAP9	0.214479	undirected	protein_coding	protein_coding
MS4A1	GRAP2	0.101392	undirected	protein_coding	protein_coding
MS4A1	CORO1A	0.187227	undirected	protein_coding	protein_coding
MS4A1	MYO1F	0.104097	undirected	protein_coding	protein_coding
MS4A1	RASSF2	0.132274	undirected	protein_coding	protein_coding
MS4A1	HCLS1	0.2008	undirected	protein_coding	protein_coding
MS4A1	C10orf128	0.140431	undirected	protein_coding	protein_coding
MS4A1	CD247	0.115655	undirected	protein_coding	protein_coding
MS4A1	RCSD1	0.240994	undirected	protein_coding	protein_coding
MS4A1	CAMK4	0.112323	undirected	protein_coding	protein_coding
MS4A1	ARHGAP15	0.196763	undirected	protein_coding	protein_coding
MS4A1	EVI2A	0.138781	undirected	protein_coding	protein_coding
MS4A1	CYTH4	0.152512	undirected	protein_coding	protein_coding
MS4A1	CD226	0.1101	undirected	protein_coding	protein_coding
MS4A1	GIMAP6	0.113269	undirected	protein_coding	protein_coding
MS4A1	FAM49A	0.131394	undirected	protein_coding	protein_coding
MS4A1	LINC00926	0.161789	undirected	protein_coding	long_non_coding
MS4A1	RASAL3	0.231112	undirected	protein_coding	protein_coding
MS4A1	IL12RB1	0.113194	undirected	protein_coding	protein_coding
MS4A1	CLEC2D	0.177487	undirected	protein_coding	protein_coding
MS4A1	GIMAP1	0.12708	undirected	protein_coding	protein_coding
MS4A1	ARHGEF6	0.164286	undirected	protein_coding	protein_coding
MS4A1	RIPOR2	0.148006	undirected	protein_coding	protein_coding
MS4A1	TLR6	0.147511	undirected	protein_coding	protein_coding
MS4A1	MYO1G	0.180365	undirected	protein_coding	protein_coding
MS4A1	GP1BA	0.122625	undirected	protein_coding	protein_coding
MS4A1	FYB1	0.124781	undirected	protein_coding	protein_coding
MS4A1	PARVG	0.167759	undirected	protein_coding	protein_coding
MS4A1	DOCK8	0.151834	undirected	protein_coding	protein_coding
MS4A1	NLRC3	0.182781	undirected	protein_coding	protein_coding
MS4A1	FGD2	0.184519	undirected	protein_coding	protein_coding
MS4A1	GAB3	0.132356	undirected	protein_coding	protein_coding
MS4A1	ARHGAP25	0.222596	undirected	protein_coding	protein_coding
MS4A1	FAM78A	0.124229	undirected	protein_coding	protein_coding
MS4A1	PCED1B-AS1	0.173502	undirected	protein_coding	long_non_coding
MS4A1	BIN2	0.175481	undirected	protein_coding	protein_coding
MS4A1	TNFAIP8L2	0.103468	undirected	protein_coding	protein_coding
MS4A1	ARHGAP30	0.151543	undirected	protein_coding	protein_coding
MS4A1	POU2F2	0.141366	undirected	protein_coding	protein_coding
MS4A1	NRROS	0.105498	undirected	protein_coding	protein_coding
MS4A1	JAK3	0.221242	undirected	protein_coding	protein_coding
MS4A1	2021-09-01	0.164621	undirected	protein_coding	protein_coding
MS4A1	WIPF1	0.170806	undirected	protein_coding	protein_coding
MS4A1	LSP1	0.127436	undirected	protein_coding	protein_coding
MS4A1	HVCN1	0.17921	undirected	protein_coding	protein_coding
MS4A1	GMFG	0.123084	undirected	protein_coding	protein_coding
MS4A1	ACAP1	0.19897	undirected	protein_coding	protein_coding
MS4A1	FLI1	0.173396	undirected	protein_coding	protein_coding
MS4A1	PIK3CD	0.123622	undirected	protein_coding	protein_coding
MS4A1	ANKRD44	0.190437	undirected	protein_coding	protein_coding
MS4A1	ST8SIA4	0.114787	undirected	protein_coding	protein_coding
MS4A1	ARHGDIB	0.146157	undirected	protein_coding	protein_coding
MS4A1	PLCG2	0.109375	undirected	protein_coding	protein_coding
MS4A1	GNG2	0.100424	undirected	protein_coding	protein_coding
MS4A1	LYL1	0.102999	undirected	protein_coding	protein_coding
MS4A1	FMNL1	0.17435	undirected	protein_coding	protein_coding
CCL19	PAX5	0.107956	undirected	protein_coding	protein_coding
CCL19	BLK	0.119966	undirected	protein_coding	protein_coding
CCL19	FCRLA	0.122124	undirected	protein_coding	protein_coding
CCL19	SPIB	0.104045	undirected	protein_coding	protein_coding
CCL19	FCRL3	0.115661	undirected	protein_coding	protein_coding
CCL19	KCNA3	0.124507	undirected	protein_coding	protein_coding
CCL19	CD22	0.125902	undirected	protein_coding	protein_coding
CCL19	TLR10	0.120638	undirected	protein_coding	protein_coding
CCL19	CR1	0.130335	undirected	protein_coding	protein_coding
CCL19	TRAT1	0.126108	undirected	protein_coding	protein_coding
CCL19	CD19	0.113177	undirected	protein_coding	protein_coding
CCL19	CD1C	0.111454	undirected	protein_coding	protein_coding
CCL19	P2RY10	0.148274	undirected	protein_coding	protein_coding
CCL19	CCR7	0.120433	undirected	protein_coding	protein_coding
CCL19	LINC00861	0.136953	undirected	protein_coding	long_non_coding
CCL19	SH2D1A	0.11306	undirected	protein_coding	protein_coding
CCL19	LY9	0.153703	undirected	protein_coding	protein_coding
CCL19	AL365361.1	0.139962	undirected	protein_coding	long_non_coding
CCL19	CD79B	0.152346	undirected	protein_coding	protein_coding
CCL19	GAPT	0.122986	undirected	protein_coding	protein_coding
CCL19	ZNF831	0.131666	undirected	protein_coding	protein_coding
CCL19	LAX1	0.106703	undirected	protein_coding	protein_coding
CCL19	CD27	0.128125	undirected	protein_coding	protein_coding
CCL19	TNFRSF13C	0.117981	undirected	protein_coding	protein_coding
CCL19	PRKCB	0.142166	undirected	protein_coding	protein_coding
CCL19	NCF1B	0.143758	undirected	protein_coding	pseudogene
CCL19	NAPSB	0.118421	undirected	protein_coding	pseudogene
CCL19	SLAMF6	0.136762	undirected	protein_coding	protein_coding
CCL19	WDFY4	0.147325	undirected	protein_coding	protein_coding
CCL19	CCR4	0.104953	undirected	protein_coding	protein_coding
CCL19	TRBV28	0.117806	undirected	protein_coding	TR
CCL19	PIK3CG	0.129103	undirected	protein_coding	protein_coding
CCL19	ITK	0.154531	undirected	protein_coding	protein_coding
CCL19	NCF1	0.144205	undirected	protein_coding	protein_coding
CCL19	CD2	0.10073	undirected	protein_coding	protein_coding
CCL19	MPEG1	0.113315	undirected	protein_coding	protein_coding
CCL19	CD84	0.112059	undirected	protein_coding	protein_coding
CCL19	CD3E	0.127117	undirected	protein_coding	protein_coding
CCL19	PTPRC	0.183725	undirected	protein_coding	protein_coding
CCL19	CD48	0.191483	undirected	protein_coding	protein_coding
CCL19	CD28	0.132873	undirected	protein_coding	protein_coding
CCL19	SIGLEC10	0.109327	undirected	protein_coding	protein_coding
CCL19	GVINP1	0.154398	undirected	protein_coding	pseudogene
CCL19	PYHIN1	0.11814	undirected	protein_coding	protein_coding
CCL19	CSF2RB	0.12809	undirected	protein_coding	protein_coding
CCL19	SELL	0.115439	undirected	protein_coding	protein_coding
CCL19	CD180	0.162996	undirected	protein_coding	protein_coding
CCL19	IL10RA	0.153985	undirected	protein_coding	protein_coding
CCL19	TNFSF8	0.166835	undirected	protein_coding	protein_coding
CCL19	ANKRD33B	0.115234	undirected	protein_coding	protein_coding
CCL19	ITGAL	0.163709	undirected	protein_coding	protein_coding
CCL19	TESPA1	0.16327	undirected	protein_coding	protein_coding
CCL19	CD37	0.184596	undirected	protein_coding	protein_coding
CCL19	PPP1R16B	0.146105	undirected	protein_coding	protein_coding
CCL19	CD96	0.104693	undirected	protein_coding	protein_coding
CCL19	BTK	0.175297	undirected	protein_coding	protein_coding
CCL19	IL21R	0.135105	undirected	protein_coding	protein_coding
CCL19	CYSLTR1	0.127949	undirected	protein_coding	protein_coding
CCL19	CD53	0.162082	undirected	protein_coding	protein_coding
CCL19	ZAP70	0.1367	undirected	protein_coding	protein_coding
CCL19	CD3D	0.102918	undirected	protein_coding	protein_coding
CCL19	CD52	0.141331	undirected	protein_coding	protein_coding
CCL19	LINC00426	0.104367	undirected	protein_coding	long_non_coding
CCL19	LY86	0.105788	undirected	protein_coding	protein_coding
CCL19	SCIMP	0.177033	undirected	protein_coding	protein_coding
CCL19	TRBC2	0.124312	undirected	protein_coding	TR
CCL19	TAGAP	0.158962	undirected	protein_coding	protein_coding
CCL19	TRAF3IP3	0.200338	undirected	protein_coding	protein_coding
CCL19	NCF1C	0.110073	undirected	protein_coding	pseudogene
CCL19	SASH3	0.200139	undirected	protein_coding	protein_coding
CCL19	IKZF1	0.195082	undirected	protein_coding	protein_coding
CCL19	IL16	0.202377	undirected	protein_coding	protein_coding
CCL19	GIMAP5	0.147745	undirected	protein_coding	protein_coding
CCL19	DOCK2	0.17301	undirected	protein_coding	protein_coding
CCL19	SP140	0.106206	undirected	protein_coding	protein_coding
CCL19	CD69	0.111758	undirected	protein_coding	protein_coding
CCL19	SPN	0.141351	undirected	protein_coding	protein_coding
CCL19	KLHL6	0.156763	undirected	protein_coding	protein_coding
CCL19	NCKAP1L	0.183268	undirected	protein_coding	protein_coding
CCL19	MAP4K1	0.180057	undirected	protein_coding	protein_coding
CCL19	TRG-AS1	0.107202	undirected	protein_coding	long_non_coding
CCL19	TRAC	0.120446	undirected	protein_coding	TR
CCL19	EVI2B	0.181348	undirected	protein_coding	protein_coding
CCL19	S1PR4	0.137582	undirected	protein_coding	protein_coding
CCL19	P2RY8	0.157135	undirected	protein_coding	protein_coding
CCL19	LCP1	0.146369	undirected	protein_coding	protein_coding
CCL19	RASGRP2	0.127212	undirected	protein_coding	protein_coding
CCL19	RHOH	0.186726	undirected	protein_coding	protein_coding
CCL19	PARP15	0.101585	undirected	protein_coding	protein_coding
CCL19	SLA	0.142181	undirected	protein_coding	protein_coding
CCL19	TMEM156	0.130038	undirected	protein_coding	protein_coding
CCL19	CD3G	0.109955	undirected	protein_coding	protein_coding
CCL19	PIK3R5	0.111404	undirected	protein_coding	protein_coding
CCL19	LRMP	0.107299	undirected	protein_coding	protein_coding
CCL19	GPR65	0.101989	undirected	protein_coding	protein_coding
CCL19	SNX20	0.11096	undirected	protein_coding	protein_coding
CCL19	FCMR	0.128875	undirected	protein_coding	protein_coding
CCL19	LILRB1	0.110147	undirected	protein_coding	protein_coding
CCL19	TBC1D10C	0.169042	undirected	protein_coding	protein_coding
CCL19	WAS	0.180157	undirected	protein_coding	protein_coding
CCL19	SLAMF1	0.145781	undirected	protein_coding	protein_coding
CCL19	PTPN7	0.108063	undirected	protein_coding	protein_coding
CCL19	DOCK10	0.139604	undirected	protein_coding	protein_coding
CCL19	CD6	0.111563	undirected	protein_coding	protein_coding
CCL19	CD1D	0.14653	undirected	protein_coding	protein_coding
CCL19	ARHGAP9	0.17335	undirected	protein_coding	protein_coding
CCL19	CORO1A	0.14731	undirected	protein_coding	protein_coding
CCL19	RASSF2	0.106209	undirected	protein_coding	protein_coding
CCL19	HCLS1	0.168362	undirected	protein_coding	protein_coding
CCL19	C10orf128	0.135804	undirected	protein_coding	protein_coding
CCL19	RCSD1	0.189087	undirected	protein_coding	protein_coding
CCL19	ARHGAP15	0.174905	undirected	protein_coding	protein_coding
CCL19	EVI2A	0.131556	undirected	protein_coding	protein_coding
CCL19	CYTH4	0.132853	undirected	protein_coding	protein_coding
CCL19	GIMAP6	0.111967	undirected	protein_coding	protein_coding
CCL19	FAM49A	0.129424	undirected	protein_coding	protein_coding
CCL19	LINC00926	0.110136	undirected	protein_coding	long_non_coding
CCL19	RASAL3	0.188676	undirected	protein_coding	protein_coding
CCL19	CLEC2D	0.144951	undirected	protein_coding	protein_coding
CCL19	GIMAP1	0.13216	undirected	protein_coding	protein_coding
CCL19	ARHGEF6	0.146697	undirected	protein_coding	protein_coding
CCL19	RIPOR2	0.102224	undirected	protein_coding	protein_coding
CCL19	TLR6	0.106977	undirected	protein_coding	protein_coding
CCL19	MYO1G	0.146273	undirected	protein_coding	protein_coding
CCL19	FYB1	0.118389	undirected	protein_coding	protein_coding
CCL19	PARVG	0.142992	undirected	protein_coding	protein_coding
CCL19	DOCK8	0.117104	undirected	protein_coding	protein_coding
CCL19	NLRC3	0.146451	undirected	protein_coding	protein_coding
CCL19	FGD2	0.140608	undirected	protein_coding	protein_coding
CCL19	GAB3	0.124703	undirected	protein_coding	protein_coding
CCL19	ARHGAP25	0.180346	undirected	protein_coding	protein_coding
CCL19	FAM78A	0.100872	undirected	protein_coding	protein_coding
CCL19	PCED1B-AS1	0.14997	undirected	protein_coding	long_non_coding
CCL19	BIN2	0.15208	undirected	protein_coding	protein_coding
CCL19	ARHGAP30	0.127146	undirected	protein_coding	protein_coding
CCL19	POU2F2	0.103235	undirected	protein_coding	protein_coding
CCL19	JAK3	0.177033	undirected	protein_coding	protein_coding
CCL19	2021-09-01	0.132954	undirected	protein_coding	protein_coding
CCL19	WIPF1	0.165095	undirected	protein_coding	protein_coding
CCL19	LSP1	0.117078	undirected	protein_coding	protein_coding
CCL19	HVCN1	0.147246	undirected	protein_coding	protein_coding
CCL19	GMFG	0.113349	undirected	protein_coding	protein_coding
CCL19	ACAP1	0.158931	undirected	protein_coding	protein_coding
CCL19	FLI1	0.150514	undirected	protein_coding	protein_coding
CCL19	ANKRD44	0.156173	undirected	protein_coding	protein_coding
CCL19	ST8SIA4	0.103787	undirected	protein_coding	protein_coding
CCL19	ARHGDIB	0.12972	undirected	protein_coding	protein_coding
CCL19	FMNL1	0.147659	undirected	protein_coding	protein_coding
HOXA11-AS	HOXA11	0.226087	undirected	long_non_coding	protein_coding
HOXA11-AS	HOXA9	0.146695	undirected	long_non_coding	protein_coding
HOXA11-AS	HOXA10	0.125015	undirected	long_non_coding	protein_coding
CHIT1	CD84	0.102684	undirected	protein_coding	protein_coding
CHIT1	ITGB2	0.107874	undirected	protein_coding	protein_coding
CHIT1	HAVCR2	0.106406	undirected	protein_coding	protein_coding
CHIT1	CD4	0.109166	undirected	protein_coding	protein_coding
PAX5	BLK	0.13895	undirected	protein_coding	protein_coding
PAX5	CXCL13	0.106863	undirected	protein_coding	protein_coding
PAX5	FCRLA	0.179832	undirected	protein_coding	protein_coding
PAX5	FCRL3	0.162008	undirected	protein_coding	protein_coding
PAX5	KCNA3	0.119154	undirected	protein_coding	protein_coding
PAX5	CD22	0.183693	undirected	protein_coding	protein_coding
PAX5	TLR10	0.168311	undirected	protein_coding	protein_coding
PAX5	CR1	0.158584	undirected	protein_coding	protein_coding
PAX5	CD19	0.127012	undirected	protein_coding	protein_coding
PAX5	P2RY10	0.138123	undirected	protein_coding	protein_coding
PAX5	CCR7	0.152693	undirected	protein_coding	protein_coding
PAX5	LINC00861	0.13142	undirected	protein_coding	long_non_coding
PAX5	LY9	0.156529	undirected	protein_coding	protein_coding
PAX5	AL365361.1	0.12127	undirected	protein_coding	long_non_coding
PAX5	CD79B	0.195421	undirected	protein_coding	protein_coding
PAX5	GAPT	0.116854	undirected	protein_coding	protein_coding
PAX5	ZNF831	0.134137	undirected	protein_coding	protein_coding
PAX5	LAX1	0.10166	undirected	protein_coding	protein_coding
PAX5	CD27	0.121657	undirected	protein_coding	protein_coding
PAX5	TNFRSF13C	0.107735	undirected	protein_coding	protein_coding
PAX5	P2RX5	0.104963	undirected	protein_coding	protein_coding
PAX5	PRKCB	0.124861	undirected	protein_coding	protein_coding
PAX5	NCF1B	0.133218	undirected	protein_coding	pseudogene
PAX5	NAPSB	0.116815	undirected	protein_coding	pseudogene
PAX5	SLAMF6	0.121312	undirected	protein_coding	protein_coding
PAX5	WDFY4	0.162187	undirected	protein_coding	protein_coding
PAX5	CCR4	0.109475	undirected	protein_coding	protein_coding
PAX5	PIK3CG	0.123395	undirected	protein_coding	protein_coding
PAX5	ITK	0.126113	undirected	protein_coding	protein_coding
PAX5	NCF1	0.126214	undirected	protein_coding	protein_coding
PAX5	PTPRC	0.157978	undirected	protein_coding	protein_coding
PAX5	CD48	0.15243	undirected	protein_coding	protein_coding
PAX5	CD28	0.13181	undirected	protein_coding	protein_coding
PAX5	GVINP1	0.148829	undirected	protein_coding	pseudogene
PAX5	CSF2RB	0.116383	undirected	protein_coding	protein_coding
PAX5	SELL	0.115961	undirected	protein_coding	protein_coding
PAX5	CD180	0.16766	undirected	protein_coding	protein_coding
PAX5	IL10RA	0.119638	undirected	protein_coding	protein_coding
PAX5	TNFSF8	0.156048	undirected	protein_coding	protein_coding
PAX5	ANKRD33B	0.137381	undirected	protein_coding	protein_coding
PAX5	ITGAL	0.134852	undirected	protein_coding	protein_coding
PAX5	TESPA1	0.153437	undirected	protein_coding	protein_coding
PAX5	CD37	0.166547	undirected	protein_coding	protein_coding
PAX5	PPP1R16B	0.15696	undirected	protein_coding	protein_coding
PAX5	BTK	0.167521	undirected	protein_coding	protein_coding
PAX5	IL21R	0.111495	undirected	protein_coding	protein_coding
PAX5	CARMIL2	0.116939	undirected	protein_coding	protein_coding
PAX5	CD53	0.124994	undirected	protein_coding	protein_coding
PAX5	ZAP70	0.117203	undirected	protein_coding	protein_coding
PAX5	CD52	0.104497	undirected	protein_coding	protein_coding
PAX5	SCIMP	0.161369	undirected	protein_coding	protein_coding
PAX5	TAGAP	0.152186	undirected	protein_coding	protein_coding
PAX5	TRAF3IP3	0.182429	undirected	protein_coding	protein_coding
PAX5	SASH3	0.185982	undirected	protein_coding	protein_coding
PAX5	IKZF1	0.178663	undirected	protein_coding	protein_coding
PAX5	IL16	0.201507	undirected	protein_coding	protein_coding
PAX5	GIMAP5	0.134973	undirected	protein_coding	protein_coding
PAX5	DOCK2	0.156042	undirected	protein_coding	protein_coding
PAX5	SP140	0.105978	undirected	protein_coding	protein_coding
PAX5	SPN	0.10336	undirected	protein_coding	protein_coding
PAX5	KLHL6	0.162616	undirected	protein_coding	protein_coding
PAX5	NCKAP1L	0.158578	undirected	protein_coding	protein_coding
PAX5	MAP4K1	0.164426	undirected	protein_coding	protein_coding
PAX5	EVI2B	0.141089	undirected	protein_coding	protein_coding
PAX5	S1PR4	0.124092	undirected	protein_coding	protein_coding
PAX5	P2RY8	0.156654	undirected	protein_coding	protein_coding
PAX5	LCP1	0.125999	undirected	protein_coding	protein_coding
PAX5	RASGRP2	0.12939	undirected	protein_coding	protein_coding
PAX5	RHOH	0.179637	undirected	protein_coding	protein_coding
PAX5	PARP15	0.112709	undirected	protein_coding	protein_coding
PAX5	SLA	0.114387	undirected	protein_coding	protein_coding
PAX5	TMEM156	0.139486	undirected	protein_coding	protein_coding
PAX5	LRMP	0.100608	undirected	protein_coding	protein_coding
PAX5	FCMR	0.172656	undirected	protein_coding	protein_coding
PAX5	TBC1D10C	0.141211	undirected	protein_coding	protein_coding
PAX5	WAS	0.140312	undirected	protein_coding	protein_coding
PAX5	SLAMF1	0.123668	undirected	protein_coding	protein_coding
PAX5	DOCK10	0.122988	undirected	protein_coding	protein_coding
PAX5	CD1D	0.141349	undirected	protein_coding	protein_coding
PAX5	ARHGAP9	0.152954	undirected	protein_coding	protein_coding
PAX5	CORO1A	0.135955	undirected	protein_coding	protein_coding
PAX5	RASSF2	0.104577	undirected	protein_coding	protein_coding
PAX5	HCLS1	0.13316	undirected	protein_coding	protein_coding
PAX5	RCSD1	0.174604	undirected	protein_coding	protein_coding
PAX5	ARHGAP15	0.132684	undirected	protein_coding	protein_coding
PAX5	CYTH4	0.102022	undirected	protein_coding	protein_coding
PAX5	RASAL3	0.159388	undirected	protein_coding	protein_coding
PAX5	CLEC2D	0.127771	undirected	protein_coding	protein_coding
PAX5	ARHGEF6	0.112488	undirected	protein_coding	protein_coding
PAX5	RIPOR2	0.124108	undirected	protein_coding	protein_coding
PAX5	TLR6	0.117159	undirected	protein_coding	protein_coding
PAX5	MYO1G	0.127883	undirected	protein_coding	protein_coding
PAX5	PARVG	0.123042	undirected	protein_coding	protein_coding
PAX5	DOCK8	0.113405	undirected	protein_coding	protein_coding
PAX5	NLRC3	0.131314	undirected	protein_coding	protein_coding
PAX5	FGD2	0.139742	undirected	protein_coding	protein_coding
PAX5	ARHGAP25	0.157039	undirected	protein_coding	protein_coding
PAX5	PCED1B-AS1	0.112895	undirected	protein_coding	long_non_coding
PAX5	BIN2	0.114464	undirected	protein_coding	protein_coding
PAX5	ARHGAP30	0.103515	undirected	protein_coding	protein_coding
PAX5	POU2F2	0.122497	undirected	protein_coding	protein_coding
PAX5	JAK3	0.157188	undirected	protein_coding	protein_coding
PAX5	2021-09-01	0.120484	undirected	protein_coding	protein_coding
PAX5	WIPF1	0.114723	undirected	protein_coding	protein_coding
PAX5	HVCN1	0.125945	undirected	protein_coding	protein_coding
PAX5	ACAP1	0.142389	undirected	protein_coding	protein_coding
PAX5	FLI1	0.11848	undirected	protein_coding	protein_coding
PAX5	ANKRD44	0.149922	undirected	protein_coding	protein_coding
PAX5	FMNL1	0.117891	undirected	protein_coding	protein_coding
PLA2G2D	CXCL13	0.153484	undirected	protein_coding	protein_coding
PLA2G2D	FCRLA	0.117401	undirected	protein_coding	protein_coding
PLA2G2D	FCRL3	0.153527	undirected	protein_coding	protein_coding
PLA2G2D	SIGLEC8	0.122367	undirected	protein_coding	protein_coding
PLA2G2D	XCR1	0.123199	undirected	protein_coding	protein_coding
PLA2G2D	AIM2	0.138723	undirected	protein_coding	protein_coding
PLA2G2D	KCNA3	0.216955	undirected	protein_coding	protein_coding
PLA2G2D	CD22	0.125983	undirected	protein_coding	protein_coding
PLA2G2D	CCR2	0.162503	undirected	protein_coding	protein_coding
PLA2G2D	GZMK	0.180195	undirected	protein_coding	protein_coding
PLA2G2D	TLR10	0.112682	undirected	protein_coding	protein_coding
PLA2G2D	CR1	0.18861	undirected	protein_coding	protein_coding
PLA2G2D	TRAT1	0.248832	undirected	protein_coding	protein_coding
PLA2G2D	TLR8	0.117665	undirected	protein_coding	protein_coding
PLA2G2D	CD19	0.149041	undirected	protein_coding	protein_coding
PLA2G2D	CLEC10A	0.100674	undirected	protein_coding	protein_coding
PLA2G2D	ADAMDEC1	0.111569	undirected	protein_coding	protein_coding
PLA2G2D	P2RY10	0.28319	undirected	protein_coding	protein_coding
PLA2G2D	CCR7	0.137502	undirected	protein_coding	protein_coding
PLA2G2D	LINC00861	0.196925	undirected	protein_coding	long_non_coding
PLA2G2D	CD8A	0.143993	undirected	protein_coding	protein_coding
PLA2G2D	SH2D1A	0.23237	undirected	protein_coding	protein_coding
PLA2G2D	CD38	0.133658	undirected	protein_coding	protein_coding
PLA2G2D	HLA-DOA	0.118896	undirected	protein_coding	protein_coding
PLA2G2D	SLAMF7	0.139561	undirected	protein_coding	protein_coding
PLA2G2D	THEMIS	0.199468	undirected	protein_coding	protein_coding
PLA2G2D	LY9	0.236271	undirected	protein_coding	protein_coding
PLA2G2D	CD8B	0.125115	undirected	protein_coding	protein_coding
PLA2G2D	AL365361.1	0.201033	undirected	protein_coding	long_non_coding
PLA2G2D	NUGGC	0.148907	undirected	protein_coding	protein_coding
PLA2G2D	CD79B	0.162561	undirected	protein_coding	protein_coding
PLA2G2D	TLR7	0.182301	undirected	protein_coding	protein_coding
PLA2G2D	FAM26F	0.107518	undirected	protein_coding	protein_coding
PLA2G2D	GAPT	0.108652	undirected	protein_coding	protein_coding
PLA2G2D	ZNF831	0.237018	undirected	protein_coding	protein_coding
PLA2G2D	EOMES	0.126886	undirected	protein_coding	protein_coding
PLA2G2D	ICAM3	0.15146	undirected	protein_coding	protein_coding
PLA2G2D	LAX1	0.185244	undirected	protein_coding	protein_coding
PLA2G2D	CD27	0.203074	undirected	protein_coding	protein_coding
PLA2G2D	PDCD1	0.165944	undirected	protein_coding	protein_coding
PLA2G2D	TNFRSF13C	0.130339	undirected	protein_coding	protein_coding
PLA2G2D	P2RX5	0.142968	undirected	protein_coding	protein_coding
PLA2G2D	NKG7	0.102215	undirected	protein_coding	protein_coding
PLA2G2D	SIRPG	0.178496	undirected	protein_coding	protein_coding
PLA2G2D	PRKCB	0.155062	undirected	protein_coding	protein_coding
PLA2G2D	AOAH	0.146597	undirected	protein_coding	protein_coding
PLA2G2D	NCF1B	0.237848	undirected	protein_coding	pseudogene
PLA2G2D	NAPSB	0.146874	undirected	protein_coding	pseudogene
PLA2G2D	SLAMF6	0.247966	undirected	protein_coding	protein_coding
PLA2G2D	WDFY4	0.241528	undirected	protein_coding	protein_coding
PLA2G2D	P2RY13	0.125979	undirected	protein_coding	protein_coding
PLA2G2D	SCML4	0.141118	undirected	protein_coding	protein_coding
PLA2G2D	HLA-DQA1	0.104709	undirected	protein_coding	protein_coding
PLA2G2D	CCR4	0.163914	undirected	protein_coding	protein_coding
PLA2G2D	HLA-DOB	0.124403	undirected	protein_coding	protein_coding
PLA2G2D	LTB	0.103475	undirected	protein_coding	protein_coding
PLA2G2D	NELL2	0.130372	undirected	protein_coding	protein_coding
PLA2G2D	TRBV28	0.234242	undirected	protein_coding	TR
PLA2G2D	PIK3CG	0.224127	undirected	protein_coding	protein_coding
PLA2G2D	ICOS	0.148398	undirected	protein_coding	protein_coding
PLA2G2D	CXCR3	0.122497	undirected	protein_coding	protein_coding
PLA2G2D	ITK	0.308846	undirected	protein_coding	protein_coding
PLA2G2D	CCL5	0.101413	undirected	protein_coding	protein_coding
PLA2G2D	NCF1	0.270919	undirected	protein_coding	protein_coding
PLA2G2D	CD2	0.235035	undirected	protein_coding	protein_coding
PLA2G2D	TIGIT	0.214401	undirected	protein_coding	protein_coding
PLA2G2D	CD40LG	0.161555	undirected	protein_coding	protein_coding
PLA2G2D	SIT1	0.182916	undirected	protein_coding	protein_coding
PLA2G2D	PLEK	0.198396	undirected	protein_coding	protein_coding
PLA2G2D	MPEG1	0.238458	undirected	protein_coding	protein_coding
PLA2G2D	CD84	0.253614	undirected	protein_coding	protein_coding
PLA2G2D	IKZF3	0.145998	undirected	protein_coding	protein_coding
PLA2G2D	CD3E	0.269458	undirected	protein_coding	protein_coding
PLA2G2D	CYBB	0.212438	undirected	protein_coding	protein_coding
PLA2G2D	PTPRC	0.362336	undirected	protein_coding	protein_coding
PLA2G2D	CD48	0.339622	undirected	protein_coding	protein_coding
PLA2G2D	CD28	0.224831	undirected	protein_coding	protein_coding
PLA2G2D	SIGLEC10	0.240823	undirected	protein_coding	protein_coding
PLA2G2D	GVINP1	0.27969	undirected	protein_coding	pseudogene
PLA2G2D	ITGB2	0.180146	undirected	protein_coding	protein_coding
PLA2G2D	TRGC2	0.121548	undirected	protein_coding	TR
PLA2G2D	C16orf54	0.150312	undirected	protein_coding	protein_coding
PLA2G2D	PYHIN1	0.240863	undirected	protein_coding	protein_coding
PLA2G2D	CSF2RB	0.205579	undirected	protein_coding	protein_coding
PLA2G2D	SELL	0.1589	undirected	protein_coding	protein_coding
PLA2G2D	CD180	0.261474	undirected	protein_coding	protein_coding
PLA2G2D	MIAT	0.13487	undirected	protein_coding	long_non_coding
PLA2G2D	IL10RA	0.304612	undirected	protein_coding	protein_coding
PLA2G2D	TFEC	0.125982	undirected	protein_coding	protein_coding
PLA2G2D	PRF1	0.11087	undirected	protein_coding	protein_coding
PLA2G2D	TNFSF8	0.291124	undirected	protein_coding	protein_coding
PLA2G2D	ADA2	0.214399	undirected	protein_coding	protein_coding
PLA2G2D	ANKRD33B	0.125953	undirected	protein_coding	protein_coding
PLA2G2D	SAMD3	0.117166	undirected	protein_coding	protein_coding
PLA2G2D	GPR171	0.133784	undirected	protein_coding	protein_coding
PLA2G2D	ITGAL	0.343031	undirected	protein_coding	protein_coding
PLA2G2D	BCL2A1	0.100383	undirected	protein_coding	protein_coding
PLA2G2D	CCL22	0.138925	undirected	protein_coding	protein_coding
PLA2G2D	TESPA1	0.247583	undirected	protein_coding	protein_coding
PLA2G2D	CSF1R	0.111016	undirected	protein_coding	protein_coding
PLA2G2D	CD37	0.267434	undirected	protein_coding	protein_coding
PLA2G2D	PPP1R16B	0.209226	undirected	protein_coding	protein_coding
PLA2G2D	CD96	0.235061	undirected	protein_coding	protein_coding
PLA2G2D	CCR5	0.204107	undirected	protein_coding	protein_coding
PLA2G2D	BTK	0.298642	undirected	protein_coding	protein_coding
PLA2G2D	IL21R	0.286426	undirected	protein_coding	protein_coding
PLA2G2D	CXCR6	0.121946	undirected	protein_coding	protein_coding
PLA2G2D	CARMIL2	0.149638	undirected	protein_coding	protein_coding
PLA2G2D	CYSLTR1	0.128462	undirected	protein_coding	protein_coding
PLA2G2D	CD5	0.150753	undirected	protein_coding	protein_coding
PLA2G2D	CD53	0.336126	undirected	protein_coding	protein_coding
PLA2G2D	ZAP70	0.276944	undirected	protein_coding	protein_coding
PLA2G2D	CD3D	0.228543	undirected	protein_coding	protein_coding
PLA2G2D	EBI3	0.155108	undirected	protein_coding	protein_coding
PLA2G2D	CD52	0.227363	undirected	protein_coding	protein_coding
PLA2G2D	LINC00426	0.178111	undirected	protein_coding	long_non_coding
PLA2G2D	LY86	0.151807	undirected	protein_coding	protein_coding
PLA2G2D	SCIMP	0.315694	undirected	protein_coding	protein_coding
PLA2G2D	ZBP1	0.106012	undirected	protein_coding	protein_coding
PLA2G2D	SPOCK2	0.135298	undirected	protein_coding	protein_coding
PLA2G2D	TRBC2	0.238947	undirected	protein_coding	TR
PLA2G2D	IL2RB	0.173767	undirected	protein_coding	protein_coding
PLA2G2D	TAGAP	0.289189	undirected	protein_coding	protein_coding
PLA2G2D	TRAF3IP3	0.357418	undirected	protein_coding	protein_coding
PLA2G2D	NCF1C	0.193433	undirected	protein_coding	pseudogene
PLA2G2D	SASH3	0.375038	undirected	protein_coding	protein_coding
PLA2G2D	IKZF1	0.351387	undirected	protein_coding	protein_coding
PLA2G2D	IL16	0.318377	undirected	protein_coding	protein_coding
PLA2G2D	ITGB7	0.155434	undirected	protein_coding	protein_coding
PLA2G2D	TLR1	0.113241	undirected	protein_coding	protein_coding
PLA2G2D	GIMAP5	0.2209	undirected	protein_coding	protein_coding
PLA2G2D	SLA2	0.135281	undirected	protein_coding	protein_coding
PLA2G2D	CTLA4	0.150518	undirected	protein_coding	protein_coding
PLA2G2D	DOCK2	0.343587	undirected	protein_coding	protein_coding
PLA2G2D	SP140	0.176194	undirected	protein_coding	protein_coding
PLA2G2D	CD69	0.193863	undirected	protein_coding	protein_coding
PLA2G2D	SPN	0.289205	undirected	protein_coding	protein_coding
PLA2G2D	CST7	0.150573	undirected	protein_coding	protein_coding
PLA2G2D	CD7	0.12094	undirected	protein_coding	protein_coding
PLA2G2D	HCST	0.12766	undirected	protein_coding	protein_coding
PLA2G2D	KLHL6	0.26415	undirected	protein_coding	protein_coding
PLA2G2D	NCKAP1L	0.345115	undirected	protein_coding	protein_coding
PLA2G2D	MAP4K1	0.329233	undirected	protein_coding	protein_coding
PLA2G2D	KLRB1	0.140125	undirected	protein_coding	protein_coding
PLA2G2D	HLA-DMB	0.100043	undirected	protein_coding	protein_coding
PLA2G2D	SUSD3	0.151877	undirected	protein_coding	protein_coding
PLA2G2D	UBASH3A	0.175319	undirected	protein_coding	protein_coding
PLA2G2D	TNFRSF9	0.151387	undirected	protein_coding	protein_coding
PLA2G2D	TRG-AS1	0.222925	undirected	protein_coding	long_non_coding
PLA2G2D	TRAC	0.254224	undirected	protein_coding	TR
PLA2G2D	IL7R	0.12713	undirected	protein_coding	protein_coding
PLA2G2D	EVI2B	0.321968	undirected	protein_coding	protein_coding
PLA2G2D	S1PR4	0.215318	undirected	protein_coding	protein_coding
PLA2G2D	P2RY8	0.226138	undirected	protein_coding	protein_coding
PLA2G2D	LCP1	0.30725	undirected	protein_coding	protein_coding
PLA2G2D	JAML	0.140753	undirected	protein_coding	protein_coding
PLA2G2D	RASGRP2	0.10979	undirected	protein_coding	protein_coding
PLA2G2D	RHOH	0.304822	undirected	protein_coding	protein_coding
PLA2G2D	RGS18	0.134505	undirected	protein_coding	protein_coding
PLA2G2D	PARP15	0.14598	undirected	protein_coding	protein_coding
PLA2G2D	PDCD1LG2	0.149607	undirected	protein_coding	protein_coding
PLA2G2D	SLA	0.293898	undirected	protein_coding	protein_coding
PLA2G2D	MS4A6A	0.131344	undirected	protein_coding	protein_coding
PLA2G2D	CASS4	0.112207	undirected	protein_coding	protein_coding
PLA2G2D	CMKLR1	0.142314	undirected	protein_coding	protein_coding
PLA2G2D	IL2RA	0.119366	undirected	protein_coding	protein_coding
PLA2G2D	TMEM156	0.179712	undirected	protein_coding	protein_coding
PLA2G2D	CD80	0.112705	undirected	protein_coding	protein_coding
PLA2G2D	LCK	0.100009	undirected	protein_coding	protein_coding
PLA2G2D	CD3G	0.244733	undirected	protein_coding	protein_coding
PLA2G2D	PIK3R5	0.232004	undirected	protein_coding	protein_coding
PLA2G2D	LRMP	0.138369	undirected	protein_coding	protein_coding
PLA2G2D	GPR65	0.217097	undirected	protein_coding	protein_coding
PLA2G2D	ITGA4	0.200103	undirected	protein_coding	protein_coding
PLA2G2D	CD86	0.153194	undirected	protein_coding	protein_coding
PLA2G2D	SNX20	0.230615	undirected	protein_coding	protein_coding
PLA2G2D	SLC2A5	0.103427	undirected	protein_coding	protein_coding
PLA2G2D	FCMR	0.143299	undirected	protein_coding	protein_coding
PLA2G2D	LILRB1	0.236162	undirected	protein_coding	protein_coding
PLA2G2D	TBC1D10C	0.320376	undirected	protein_coding	protein_coding
PLA2G2D	RNASE6	0.144037	undirected	protein_coding	protein_coding
PLA2G2D	SAMSN1	0.19823	undirected	protein_coding	protein_coding
PLA2G2D	GIMAP7	0.128981	undirected	protein_coding	protein_coding
PLA2G2D	MS4A7	0.101371	undirected	protein_coding	protein_coding
PLA2G2D	WAS	0.34464	undirected	protein_coding	protein_coding
PLA2G2D	SLAMF1	0.267545	undirected	protein_coding	protein_coding
PLA2G2D	PTPN7	0.22929	undirected	protein_coding	protein_coding
PLA2G2D	LAIR1	0.181299	undirected	protein_coding	protein_coding
PLA2G2D	DOCK10	0.259243	undirected	protein_coding	protein_coding
PLA2G2D	CYTIP	0.148555	undirected	protein_coding	protein_coding
PLA2G2D	CXorf21	0.171825	undirected	protein_coding	protein_coding
PLA2G2D	HCK	0.107648	undirected	protein_coding	protein_coding
PLA2G2D	CD6	0.245551	undirected	protein_coding	protein_coding
PLA2G2D	CD1D	0.18237	undirected	protein_coding	protein_coding
PLA2G2D	LAPTM5	0.196293	undirected	protein_coding	protein_coding
PLA2G2D	IGSF6	0.117402	undirected	protein_coding	protein_coding
PLA2G2D	GPR183	0.100805	undirected	protein_coding	protein_coding
PLA2G2D	MIR155HG	0.125011	undirected	protein_coding	long_non_coding
PLA2G2D	AIF1	0.12195	undirected	protein_coding	protein_coding
PLA2G2D	ARHGAP9	0.330486	undirected	protein_coding	protein_coding
PLA2G2D	GRAP2	0.17938	undirected	protein_coding	protein_coding
PLA2G2D	CD72	0.137985	undirected	protein_coding	protein_coding
PLA2G2D	HAVCR2	0.101217	undirected	protein_coding	protein_coding
PLA2G2D	CORO1A	0.280606	undirected	protein_coding	protein_coding
PLA2G2D	MYO1F	0.211087	undirected	protein_coding	protein_coding
PLA2G2D	RASSF2	0.13822	undirected	protein_coding	protein_coding
PLA2G2D	HCLS1	0.30941	undirected	protein_coding	protein_coding
PLA2G2D	C10orf128	0.17265	undirected	protein_coding	protein_coding
PLA2G2D	MATK	0.112719	undirected	protein_coding	protein_coding
PLA2G2D	DOK2	0.191036	undirected	protein_coding	protein_coding
PLA2G2D	CD247	0.223503	undirected	protein_coding	protein_coding
PLA2G2D	RCSD1	0.291584	undirected	protein_coding	protein_coding
PLA2G2D	ITGAM	0.113297	undirected	protein_coding	protein_coding
PLA2G2D	SLFN12L	0.130608	undirected	protein_coding	protein_coding
PLA2G2D	CAMK4	0.135565	undirected	protein_coding	protein_coding
PLA2G2D	RUNX3	0.138329	undirected	protein_coding	protein_coding
PLA2G2D	SPI1	0.152549	undirected	protein_coding	protein_coding
PLA2G2D	ITGAX	0.101257	undirected	protein_coding	protein_coding
PLA2G2D	ARHGAP15	0.252632	undirected	protein_coding	protein_coding
PLA2G2D	CD4	0.216464	undirected	protein_coding	protein_coding
PLA2G2D	EVI2A	0.228534	undirected	protein_coding	protein_coding
PLA2G2D	SELPLG	0.122349	undirected	protein_coding	protein_coding
PLA2G2D	CYTH4	0.274219	undirected	protein_coding	protein_coding
PLA2G2D	CXCR4	0.111336	undirected	protein_coding	protein_coding
PLA2G2D	CD226	0.207771	undirected	protein_coding	protein_coding
PLA2G2D	GIMAP6	0.167569	undirected	protein_coding	protein_coding
PLA2G2D	FAM49A	0.153039	undirected	protein_coding	protein_coding
PLA2G2D	RASAL3	0.346448	undirected	protein_coding	protein_coding
PLA2G2D	GPR132	0.115534	undirected	protein_coding	protein_coding
PLA2G2D	IL12RB1	0.228553	undirected	protein_coding	protein_coding
PLA2G2D	FOXP3	0.137568	undirected	protein_coding	protein_coding
PLA2G2D	CLEC2D	0.252675	undirected	protein_coding	protein_coding
PLA2G2D	MMP25	0.10908	undirected	protein_coding	protein_coding
PLA2G2D	LCP2	0.225781	undirected	protein_coding	protein_coding
PLA2G2D	GIMAP1	0.150003	undirected	protein_coding	protein_coding
PLA2G2D	GFI1	0.120509	undirected	protein_coding	protein_coding
PLA2G2D	ARHGEF6	0.206916	undirected	protein_coding	protein_coding
PLA2G2D	RIPOR2	0.125924	undirected	protein_coding	protein_coding
PLA2G2D	MILR1	0.109779	undirected	protein_coding	protein_coding
PLA2G2D	IL18RAP	0.101317	undirected	protein_coding	protein_coding
PLA2G2D	TLR6	0.163574	undirected	protein_coding	protein_coding
PLA2G2D	APOBEC3G	0.140008	undirected	protein_coding	protein_coding
PLA2G2D	GNGT2	0.137994	undirected	protein_coding	protein_coding
PLA2G2D	ZC3H12D	0.132627	undirected	protein_coding	protein_coding
PLA2G2D	MYO1G	0.294154	undirected	protein_coding	protein_coding
PLA2G2D	SFMBT2	0.143818	undirected	protein_coding	protein_coding
PLA2G2D	CYFIP2	0.10681	undirected	protein_coding	protein_coding
PLA2G2D	GIMAP4	0.156366	undirected	protein_coding	protein_coding
PLA2G2D	NCF4	0.113569	undirected	protein_coding	protein_coding
PLA2G2D	GP1BA	0.121182	undirected	protein_coding	protein_coding
PLA2G2D	FYB1	0.213273	undirected	protein_coding	protein_coding
PLA2G2D	FGR	0.100455	undirected	protein_coding	protein_coding
PLA2G2D	PARVG	0.255989	undirected	protein_coding	protein_coding
PLA2G2D	IPCEF1	0.136681	undirected	protein_coding	protein_coding
PLA2G2D	INPP5D	0.11112	undirected	protein_coding	protein_coding
PLA2G2D	DOCK8	0.22861	undirected	protein_coding	protein_coding
PLA2G2D	NLRC3	0.274473	undirected	protein_coding	protein_coding
PLA2G2D	GIMAP8	0.127827	undirected	protein_coding	protein_coding
PLA2G2D	FGD2	0.219051	undirected	protein_coding	protein_coding
PLA2G2D	CLEC4A	0.112422	undirected	protein_coding	protein_coding
PLA2G2D	GAB3	0.184628	undirected	protein_coding	protein_coding
PLA2G2D	OPRL1	0.113155	undirected	protein_coding	protein_coding
PLA2G2D	ARHGAP25	0.32116	undirected	protein_coding	protein_coding
PLA2G2D	FAM78A	0.214951	undirected	protein_coding	protein_coding
PLA2G2D	PCED1B-AS1	0.241404	undirected	protein_coding	long_non_coding
PLA2G2D	BIN2	0.314159	undirected	protein_coding	protein_coding
PLA2G2D	RASGRP1	0.122419	undirected	protein_coding	protein_coding
PLA2G2D	VAV1	0.147018	undirected	protein_coding	protein_coding
PLA2G2D	SRGN	0.175764	undirected	protein_coding	protein_coding
PLA2G2D	STX11	0.118719	undirected	protein_coding	protein_coding
PLA2G2D	TNFAIP8L2	0.210033	undirected	protein_coding	protein_coding
PLA2G2D	ARHGAP30	0.252916	undirected	protein_coding	protein_coding
PLA2G2D	TSPOAP1-AS1	0.119285	undirected	protein_coding	long_non_coding
PLA2G2D	PTPN22	0.122393	undirected	protein_coding	protein_coding
PLA2G2D	VCAM1	0.100591	undirected	protein_coding	protein_coding
PLA2G2D	STAT4	0.188884	undirected	protein_coding	protein_coding
PLA2G2D	APOBEC3D	0.120541	undirected	protein_coding	protein_coding
PLA2G2D	KLRG1	0.101238	undirected	protein_coding	protein_coding
PLA2G2D	POU2F2	0.104194	undirected	protein_coding	protein_coding
PLA2G2D	NRROS	0.178734	undirected	protein_coding	protein_coding
PLA2G2D	SNAI3	0.128085	undirected	protein_coding	protein_coding
PLA2G2D	IL6R	0.107607	undirected	protein_coding	protein_coding
PLA2G2D	JAK3	0.335061	undirected	protein_coding	protein_coding
PLA2G2D	2021-09-01	0.219413	undirected	protein_coding	protein_coding
PLA2G2D	SLCO2B1	0.117785	undirected	protein_coding	protein_coding
PLA2G2D	LIMD2	0.129467	undirected	protein_coding	protein_coding
PLA2G2D	WIPF1	0.240956	undirected	protein_coding	protein_coding
PLA2G2D	KMO	0.139748	undirected	protein_coding	protein_coding
PLA2G2D	TMC8	0.159759	undirected	protein_coding	protein_coding
PLA2G2D	LSP1	0.209624	undirected	protein_coding	protein_coding
PLA2G2D	PLCB2	0.125409	undirected	protein_coding	protein_coding
PLA2G2D	HVCN1	0.21016	undirected	protein_coding	protein_coding
PLA2G2D	GMFG	0.1816	undirected	protein_coding	protein_coding
PLA2G2D	ACAP1	0.24895	undirected	protein_coding	protein_coding
PLA2G2D	FLI1	0.20491	undirected	protein_coding	protein_coding
PLA2G2D	CLIC2	0.100128	undirected	protein_coding	protein_coding
PLA2G2D	PIK3CD	0.180191	undirected	protein_coding	protein_coding
PLA2G2D	ANKRD44	0.218123	undirected	protein_coding	protein_coding
PLA2G2D	EVL	0.122041	undirected	protein_coding	protein_coding
PLA2G2D	PSTPIP1	0.151822	undirected	protein_coding	protein_coding
PLA2G2D	GPSM3	0.108906	undirected	protein_coding	protein_coding
PLA2G2D	RBP5	0.10017	undirected	protein_coding	protein_coding
PLA2G2D	AC008105.3	0.105943	undirected	protein_coding	long_non_coding
PLA2G2D	LAT2	0.125459	undirected	protein_coding	protein_coding
PLA2G2D	ST8SIA4	0.204602	undirected	protein_coding	protein_coding
PLA2G2D	ARHGDIB	0.221236	undirected	protein_coding	protein_coding
PLA2G2D	PATL2	0.10202	undirected	protein_coding	protein_coding
PLA2G2D	DOK3	0.136846	undirected	protein_coding	protein_coding
PLA2G2D	PLCG2	0.11234	undirected	protein_coding	protein_coding
PLA2G2D	GNG2	0.125034	undirected	protein_coding	protein_coding
PLA2G2D	FMNL1	0.267641	undirected	protein_coding	protein_coding
PLA2G2D	CD83	0.119796	undirected	protein_coding	protein_coding
PLA2G2D	TSPAN33	0.11107	undirected	protein_coding	protein_coding
PLA2G2D	TRANK1	0.125995	undirected	protein_coding	protein_coding
PLA2G2D	JADE2	0.109188	undirected	protein_coding	protein_coding
PLA2G2D	FGD3	0.146874	undirected	protein_coding	protein_coding
BLK	CXCL13	0.114967	undirected	protein_coding	protein_coding
BLK	FCRLA	0.183843	undirected	protein_coding	protein_coding
BLK	SPIB	0.126082	undirected	protein_coding	protein_coding
BLK	FCRL3	0.159129	undirected	protein_coding	protein_coding
BLK	KCNA3	0.148205	undirected	protein_coding	protein_coding
BLK	CD22	0.179631	undirected	protein_coding	protein_coding
BLK	TLR10	0.169696	undirected	protein_coding	protein_coding
BLK	CR1	0.159693	undirected	protein_coding	protein_coding
BLK	TRAT1	0.118808	undirected	protein_coding	protein_coding
BLK	CD19	0.129098	undirected	protein_coding	protein_coding
BLK	P2RY10	0.159265	undirected	protein_coding	protein_coding
BLK	CCR7	0.164825	undirected	protein_coding	protein_coding
BLK	LINC00861	0.151708	undirected	protein_coding	long_non_coding
BLK	SH2D1A	0.101281	undirected	protein_coding	protein_coding
BLK	LY9	0.180563	undirected	protein_coding	protein_coding
BLK	AL365361.1	0.155352	undirected	protein_coding	long_non_coding
BLK	CD79B	0.210162	undirected	protein_coding	protein_coding
BLK	GAPT	0.13388	undirected	protein_coding	protein_coding
BLK	ZNF831	0.148887	undirected	protein_coding	protein_coding
BLK	ICAM3	0.100789	undirected	protein_coding	protein_coding
BLK	LAX1	0.127625	undirected	protein_coding	protein_coding
BLK	CD27	0.149105	undirected	protein_coding	protein_coding
BLK	TNFRSF13C	0.125464	undirected	protein_coding	protein_coding
BLK	PRKCB	0.141647	undirected	protein_coding	protein_coding
BLK	NCF1B	0.154128	undirected	protein_coding	pseudogene
BLK	NAPSB	0.133781	undirected	protein_coding	pseudogene
BLK	SLAMF6	0.144752	undirected	protein_coding	protein_coding
BLK	WDFY4	0.174196	undirected	protein_coding	protein_coding
BLK	CCR4	0.126705	undirected	protein_coding	protein_coding
BLK	TRBV28	0.101282	undirected	protein_coding	TR
BLK	PIK3CG	0.144554	undirected	protein_coding	protein_coding
BLK	ITK	0.150083	undirected	protein_coding	protein_coding
BLK	NCF1	0.148194	undirected	protein_coding	protein_coding
BLK	MPEG1	0.105171	undirected	protein_coding	protein_coding
BLK	BANK1	0.105486	undirected	protein_coding	protein_coding
BLK	CD3E	0.108388	undirected	protein_coding	protein_coding
BLK	PTPRC	0.184001	undirected	protein_coding	protein_coding
BLK	CD48	0.184608	undirected	protein_coding	protein_coding
BLK	CD28	0.148861	undirected	protein_coding	protein_coding
BLK	SIGLEC10	0.104579	undirected	protein_coding	protein_coding
BLK	GVINP1	0.165885	undirected	protein_coding	pseudogene
BLK	PYHIN1	0.107294	undirected	protein_coding	protein_coding
BLK	CSF2RB	0.140594	undirected	protein_coding	protein_coding
BLK	SELL	0.13243	undirected	protein_coding	protein_coding
BLK	CD180	0.186031	undirected	protein_coding	protein_coding
BLK	IL10RA	0.14917	undirected	protein_coding	protein_coding
BLK	TNFSF8	0.180606	undirected	protein_coding	protein_coding
BLK	ANKRD33B	0.145054	undirected	protein_coding	protein_coding
BLK	ITGAL	0.159065	undirected	protein_coding	protein_coding
BLK	TESPA1	0.174178	undirected	protein_coding	protein_coding
BLK	CD37	0.194959	undirected	protein_coding	protein_coding
BLK	PPP1R16B	0.176165	undirected	protein_coding	protein_coding
BLK	BTK	0.188411	undirected	protein_coding	protein_coding
BLK	IL21R	0.132068	undirected	protein_coding	protein_coding
BLK	CARMIL2	0.111209	undirected	protein_coding	protein_coding
BLK	CYSLTR1	0.111385	undirected	protein_coding	protein_coding
BLK	CD53	0.151745	undirected	protein_coding	protein_coding
BLK	ZAP70	0.138039	undirected	protein_coding	protein_coding
BLK	CD52	0.13067	undirected	protein_coding	protein_coding
BLK	LINC00426	0.110019	undirected	protein_coding	long_non_coding
BLK	SCIMP	0.181481	undirected	protein_coding	protein_coding
BLK	TRBC2	0.106184	undirected	protein_coding	TR
BLK	TAGAP	0.169915	undirected	protein_coding	protein_coding
BLK	TRAF3IP3	0.209323	undirected	protein_coding	protein_coding
BLK	NCF1C	0.11147	undirected	protein_coding	pseudogene
BLK	SASH3	0.210968	undirected	protein_coding	protein_coding
BLK	IKZF1	0.206027	undirected	protein_coding	protein_coding
BLK	IL16	0.22779	undirected	protein_coding	protein_coding
BLK	GIMAP5	0.159457	undirected	protein_coding	protein_coding
BLK	DOCK2	0.179628	undirected	protein_coding	protein_coding
BLK	SP140	0.12018	undirected	protein_coding	protein_coding
BLK	CD69	0.10497	undirected	protein_coding	protein_coding
BLK	SPN	0.1262	undirected	protein_coding	protein_coding
BLK	KLHL6	0.184268	undirected	protein_coding	protein_coding
BLK	NCKAP1L	0.182861	undirected	protein_coding	protein_coding
BLK	MAP4K1	0.189994	undirected	protein_coding	protein_coding
BLK	EVI2B	0.173942	undirected	protein_coding	protein_coding
BLK	S1PR4	0.152932	undirected	protein_coding	protein_coding
BLK	P2RY8	0.188201	undirected	protein_coding	protein_coding
BLK	LCP1	0.1453	undirected	protein_coding	protein_coding
BLK	RASGRP2	0.144481	undirected	protein_coding	protein_coding
BLK	RHOH	0.206437	undirected	protein_coding	protein_coding
BLK	PARP15	0.11804	undirected	protein_coding	protein_coding
BLK	SLA	0.13894	undirected	protein_coding	protein_coding
BLK	TMEM156	0.164758	undirected	protein_coding	protein_coding
BLK	PIK3R5	0.111271	undirected	protein_coding	protein_coding
BLK	LRMP	0.103212	undirected	protein_coding	protein_coding
BLK	ITGA4	0.104204	undirected	protein_coding	protein_coding
BLK	SNX20	0.105501	undirected	protein_coding	protein_coding
BLK	FCMR	0.176395	undirected	protein_coding	protein_coding
BLK	LILRB1	0.10277	undirected	protein_coding	protein_coding
BLK	TBC1D10C	0.167499	undirected	protein_coding	protein_coding
BLK	WAS	0.170948	undirected	protein_coding	protein_coding
BLK	SLAMF1	0.149794	undirected	protein_coding	protein_coding
BLK	PTPN7	0.105802	undirected	protein_coding	protein_coding
BLK	DOCK10	0.142664	undirected	protein_coding	protein_coding
BLK	CD6	0.107906	undirected	protein_coding	protein_coding
BLK	CD1D	0.166131	undirected	protein_coding	protein_coding
BLK	ARHGAP9	0.175582	undirected	protein_coding	protein_coding
BLK	CORO1A	0.155553	undirected	protein_coding	protein_coding
BLK	RASSF2	0.116849	undirected	protein_coding	protein_coding
BLK	HCLS1	0.165758	undirected	protein_coding	protein_coding
BLK	C10orf128	0.123046	undirected	protein_coding	protein_coding
BLK	RCSD1	0.207821	undirected	protein_coding	protein_coding
BLK	ARHGAP15	0.166207	undirected	protein_coding	protein_coding
BLK	EVI2A	0.112832	undirected	protein_coding	protein_coding
BLK	CYTH4	0.123567	undirected	protein_coding	protein_coding
BLK	FAM49A	0.117121	undirected	protein_coding	protein_coding
BLK	LINC00926	0.125031	undirected	protein_coding	long_non_coding
BLK	RASAL3	0.190863	undirected	protein_coding	protein_coding
BLK	CLEC2D	0.146495	undirected	protein_coding	protein_coding
BLK	GIMAP1	0.112075	undirected	protein_coding	protein_coding
BLK	ARHGEF6	0.142451	undirected	protein_coding	protein_coding
BLK	RIPOR2	0.131458	undirected	protein_coding	protein_coding
BLK	TLR6	0.128385	undirected	protein_coding	protein_coding
BLK	MYO1G	0.148463	undirected	protein_coding	protein_coding
BLK	FYB1	0.100183	undirected	protein_coding	protein_coding
BLK	PARVG	0.141534	undirected	protein_coding	protein_coding
BLK	DOCK8	0.126123	undirected	protein_coding	protein_coding
BLK	NLRC3	0.148917	undirected	protein_coding	protein_coding
BLK	FGD2	0.158985	undirected	protein_coding	protein_coding
BLK	GAB3	0.115025	undirected	protein_coding	protein_coding
BLK	ARHGAP25	0.183857	undirected	protein_coding	protein_coding
BLK	FAM78A	0.100504	undirected	protein_coding	protein_coding
BLK	PCED1B-AS1	0.142705	undirected	protein_coding	long_non_coding
BLK	BIN2	0.139138	undirected	protein_coding	protein_coding
BLK	ARHGAP30	0.122423	undirected	protein_coding	protein_coding
BLK	POU2F2	0.125685	undirected	protein_coding	protein_coding
BLK	JAK3	0.183221	undirected	protein_coding	protein_coding
BLK	2021-09-01	0.135826	undirected	protein_coding	protein_coding
BLK	WIPF1	0.144405	undirected	protein_coding	protein_coding
BLK	LSP1	0.104539	undirected	protein_coding	protein_coding
BLK	HVCN1	0.151405	undirected	protein_coding	protein_coding
BLK	GMFG	0.103022	undirected	protein_coding	protein_coding
BLK	ACAP1	0.165831	undirected	protein_coding	protein_coding
BLK	FLI1	0.153557	undirected	protein_coding	protein_coding
BLK	PIK3CD	0.102848	undirected	protein_coding	protein_coding
BLK	ANKRD44	0.165188	undirected	protein_coding	protein_coding
BLK	ARHGDIB	0.121274	undirected	protein_coding	protein_coding
BLK	FMNL1	0.144385	undirected	protein_coding	protein_coding
CXCL13	FCRLA	0.139884	undirected	protein_coding	protein_coding
CXCL13	FCRL3	0.167718	undirected	protein_coding	protein_coding
CXCL13	XCR1	0.100234	undirected	protein_coding	protein_coding
CXCL13	AIM2	0.12779	undirected	protein_coding	protein_coding
CXCL13	KCNA3	0.209655	undirected	protein_coding	protein_coding
CXCL13	CD22	0.148965	undirected	protein_coding	protein_coding
CXCL13	CCR2	0.151378	undirected	protein_coding	protein_coding
CXCL13	GZMK	0.187765	undirected	protein_coding	protein_coding
CXCL13	TLR10	0.131459	undirected	protein_coding	protein_coding
CXCL13	CR1	0.191733	undirected	protein_coding	protein_coding
CXCL13	TRAT1	0.24913	undirected	protein_coding	protein_coding
CXCL13	CD19	0.1568	undirected	protein_coding	protein_coding
CXCL13	CD1C	0.103895	undirected	protein_coding	protein_coding
CXCL13	P2RY10	0.283235	undirected	protein_coding	protein_coding
CXCL13	CCR7	0.152156	undirected	protein_coding	protein_coding
CXCL13	LINC00861	0.212953	undirected	protein_coding	long_non_coding
CXCL13	CD8A	0.143886	undirected	protein_coding	protein_coding
CXCL13	SH2D1A	0.240784	undirected	protein_coding	protein_coding
CXCL13	CD38	0.114822	undirected	protein_coding	protein_coding
CXCL13	SLAMF7	0.118301	undirected	protein_coding	protein_coding
CXCL13	THEMIS	0.199192	undirected	protein_coding	protein_coding
CXCL13	LY9	0.244064	undirected	protein_coding	protein_coding
CXCL13	CD8B	0.107764	undirected	protein_coding	protein_coding
CXCL13	AL365361.1	0.209673	undirected	protein_coding	long_non_coding
CXCL13	NUGGC	0.136426	undirected	protein_coding	protein_coding
CXCL13	CD79B	0.193482	undirected	protein_coding	protein_coding
CXCL13	TLR7	0.161331	undirected	protein_coding	protein_coding
CXCL13	GAPT	0.126835	undirected	protein_coding	protein_coding
CXCL13	ZNF831	0.240586	undirected	protein_coding	protein_coding
CXCL13	EOMES	0.111834	undirected	protein_coding	protein_coding
CXCL13	ICAM3	0.145366	undirected	protein_coding	protein_coding
CXCL13	LAX1	0.184451	undirected	protein_coding	protein_coding
CXCL13	CD27	0.212296	undirected	protein_coding	protein_coding
CXCL13	PDCD1	0.144767	undirected	protein_coding	protein_coding
CXCL13	TNFRSF13C	0.148739	undirected	protein_coding	protein_coding
CXCL13	P2RX5	0.145469	undirected	protein_coding	protein_coding
CXCL13	SIRPG	0.174512	undirected	protein_coding	protein_coding
CXCL13	PRKCB	0.177784	undirected	protein_coding	protein_coding
CXCL13	AOAH	0.122131	undirected	protein_coding	protein_coding
CXCL13	NCF1B	0.238218	undirected	protein_coding	pseudogene
CXCL13	NAPSB	0.154531	undirected	protein_coding	pseudogene
CXCL13	SLAMF6	0.258504	undirected	protein_coding	protein_coding
CXCL13	WDFY4	0.231323	undirected	protein_coding	protein_coding
CXCL13	P2RY13	0.11335	undirected	protein_coding	protein_coding
CXCL13	SCML4	0.132682	undirected	protein_coding	protein_coding
CXCL13	CCR4	0.164822	undirected	protein_coding	protein_coding
CXCL13	HLA-DOB	0.117489	undirected	protein_coding	protein_coding
CXCL13	LTB	0.110395	undirected	protein_coding	protein_coding
CXCL13	NELL2	0.114848	undirected	protein_coding	protein_coding
CXCL13	TRBV28	0.235476	undirected	protein_coding	TR
CXCL13	PIK3CG	0.213408	undirected	protein_coding	protein_coding
CXCL13	ICOS	0.130627	undirected	protein_coding	protein_coding
CXCL13	CXCR3	0.11461	undirected	protein_coding	protein_coding
CXCL13	ITK	0.311505	undirected	protein_coding	protein_coding
CXCL13	NCF1	0.257947	undirected	protein_coding	protein_coding
CXCL13	CD2	0.230046	undirected	protein_coding	protein_coding
CXCL13	TIGIT	0.2094	undirected	protein_coding	protein_coding
CXCL13	CD40LG	0.162142	undirected	protein_coding	protein_coding
CXCL13	SIT1	0.181421	undirected	protein_coding	protein_coding
CXCL13	PLEK	0.168099	undirected	protein_coding	protein_coding
CXCL13	MPEG1	0.207108	undirected	protein_coding	protein_coding
CXCL13	CD84	0.21874	undirected	protein_coding	protein_coding
CXCL13	IKZF3	0.134483	undirected	protein_coding	protein_coding
CXCL13	CD3E	0.269057	undirected	protein_coding	protein_coding
CXCL13	CYBB	0.17839	undirected	protein_coding	protein_coding
CXCL13	PTPRC	0.350064	undirected	protein_coding	protein_coding
CXCL13	CD48	0.337537	undirected	protein_coding	protein_coding
CXCL13	CD28	0.221943	undirected	protein_coding	protein_coding
CXCL13	SIGLEC10	0.214044	undirected	protein_coding	protein_coding
CXCL13	GVINP1	0.282118	undirected	protein_coding	pseudogene
CXCL13	ITGB2	0.139854	undirected	protein_coding	protein_coding
CXCL13	TRGC2	0.118411	undirected	protein_coding	TR
CXCL13	C16orf54	0.155941	undirected	protein_coding	protein_coding
CXCL13	PYHIN1	0.244911	undirected	protein_coding	protein_coding
CXCL13	CSF2RB	0.199768	undirected	protein_coding	protein_coding
CXCL13	SELL	0.170516	undirected	protein_coding	protein_coding
CXCL13	CD180	0.256449	undirected	protein_coding	protein_coding
CXCL13	MIAT	0.118445	undirected	protein_coding	long_non_coding
CXCL13	IL10RA	0.275928	undirected	protein_coding	protein_coding
CXCL13	TFEC	0.111079	undirected	protein_coding	protein_coding
CXCL13	TNFSF8	0.287065	undirected	protein_coding	protein_coding
CXCL13	ADA2	0.180642	undirected	protein_coding	protein_coding
CXCL13	ANKRD33B	0.14202	undirected	protein_coding	protein_coding
CXCL13	SAMD3	0.109597	undirected	protein_coding	protein_coding
CXCL13	GPR171	0.138062	undirected	protein_coding	protein_coding
CXCL13	ITGAL	0.321516	undirected	protein_coding	protein_coding
CXCL13	CCL22	0.122224	undirected	protein_coding	protein_coding
CXCL13	TESPA1	0.263432	undirected	protein_coding	protein_coding
CXCL13	CD37	0.281999	undirected	protein_coding	protein_coding
CXCL13	PPP1R16B	0.219478	undirected	protein_coding	protein_coding
CXCL13	CD96	0.23274	undirected	protein_coding	protein_coding
CXCL13	CCR5	0.187754	undirected	protein_coding	protein_coding
CXCL13	BTK	0.290361	undirected	protein_coding	protein_coding
CXCL13	IL21R	0.276128	undirected	protein_coding	protein_coding
CXCL13	CXCR6	0.104357	undirected	protein_coding	protein_coding
CXCL13	CARMIL2	0.139818	undirected	protein_coding	protein_coding
CXCL13	CYSLTR1	0.143064	undirected	protein_coding	protein_coding
CXCL13	CD5	0.13311	undirected	protein_coding	protein_coding
CXCL13	CD53	0.309779	undirected	protein_coding	protein_coding
CXCL13	ZAP70	0.277232	undirected	protein_coding	protein_coding
CXCL13	CD3D	0.227896	undirected	protein_coding	protein_coding
CXCL13	EBI3	0.142507	undirected	protein_coding	protein_coding
CXCL13	CD52	0.234957	undirected	protein_coding	protein_coding
CXCL13	LINC00426	0.188339	undirected	protein_coding	long_non_coding
CXCL13	LY86	0.146331	undirected	protein_coding	protein_coding
CXCL13	SCIMP	0.297793	undirected	protein_coding	protein_coding
CXCL13	SPOCK2	0.124946	undirected	protein_coding	protein_coding
CXCL13	TRBC2	0.246993	undirected	protein_coding	TR
CXCL13	IL2RB	0.15886	undirected	protein_coding	protein_coding
CXCL13	TAGAP	0.278249	undirected	protein_coding	protein_coding
CXCL13	TRAF3IP3	0.358259	undirected	protein_coding	protein_coding
CXCL13	NCF1C	0.190409	undirected	protein_coding	pseudogene
CXCL13	SASH3	0.364772	undirected	protein_coding	protein_coding
CXCL13	IKZF1	0.348085	undirected	protein_coding	protein_coding
CXCL13	IL16	0.325839	undirected	protein_coding	protein_coding
CXCL13	ITGB7	0.129997	undirected	protein_coding	protein_coding
CXCL13	TLR1	0.101457	undirected	protein_coding	protein_coding
CXCL13	GIMAP5	0.228496	undirected	protein_coding	protein_coding
CXCL13	SLA2	0.123875	undirected	protein_coding	protein_coding
CXCL13	CTLA4	0.123896	undirected	protein_coding	protein_coding
CXCL13	DOCK2	0.31706	undirected	protein_coding	protein_coding
CXCL13	SP140	0.184276	undirected	protein_coding	protein_coding
CXCL13	CD69	0.19909	undirected	protein_coding	protein_coding
CXCL13	SPN	0.275415	undirected	protein_coding	protein_coding
CXCL13	CST7	0.147957	undirected	protein_coding	protein_coding
CXCL13	CD7	0.100483	undirected	protein_coding	protein_coding
CXCL13	HCST	0.119782	undirected	protein_coding	protein_coding
CXCL13	KLHL6	0.257879	undirected	protein_coding	protein_coding
CXCL13	NCKAP1L	0.321582	undirected	protein_coding	protein_coding
CXCL13	MAP4K1	0.334513	undirected	protein_coding	protein_coding
CXCL13	KLRB1	0.133202	undirected	protein_coding	protein_coding
CXCL13	SUSD3	0.136357	undirected	protein_coding	protein_coding
CXCL13	UBASH3A	0.171887	undirected	protein_coding	protein_coding
CXCL13	TNFRSF9	0.132046	undirected	protein_coding	protein_coding
CXCL13	TRG-AS1	0.221513	undirected	protein_coding	long_non_coding
CXCL13	TRAC	0.249442	undirected	protein_coding	TR
CXCL13	IL7R	0.118497	undirected	protein_coding	protein_coding
CXCL13	EVI2B	0.318196	undirected	protein_coding	protein_coding
CXCL13	S1PR4	0.224528	undirected	protein_coding	protein_coding
CXCL13	P2RY8	0.234055	undirected	protein_coding	protein_coding
CXCL13	LCP1	0.284293	undirected	protein_coding	protein_coding
CXCL13	JAML	0.130654	undirected	protein_coding	protein_coding
CXCL13	RASGRP2	0.135647	undirected	protein_coding	protein_coding
CXCL13	RHOH	0.315246	undirected	protein_coding	protein_coding
CXCL13	RGS18	0.12157	undirected	protein_coding	protein_coding
CXCL13	PARP15	0.150536	undirected	protein_coding	protein_coding
CXCL13	PDCD1LG2	0.129685	undirected	protein_coding	protein_coding
CXCL13	SLA	0.272653	undirected	protein_coding	protein_coding
CXCL13	MS4A6A	0.106482	undirected	protein_coding	protein_coding
CXCL13	CMKLR1	0.110123	undirected	protein_coding	protein_coding
CXCL13	TMEM156	0.193278	undirected	protein_coding	protein_coding
CXCL13	CD3G	0.242821	undirected	protein_coding	protein_coding
CXCL13	PIK3R5	0.200736	undirected	protein_coding	protein_coding
CXCL13	LRMP	0.138485	undirected	protein_coding	protein_coding
CXCL13	GPR65	0.197556	undirected	protein_coding	protein_coding
CXCL13	ITGA4	0.183579	undirected	protein_coding	protein_coding
CXCL13	CD86	0.122415	undirected	protein_coding	protein_coding
CXCL13	SNX20	0.21529	undirected	protein_coding	protein_coding
CXCL13	FCMR	0.170266	undirected	protein_coding	protein_coding
CXCL13	LILRB1	0.207706	undirected	protein_coding	protein_coding
CXCL13	TBC1D10C	0.324874	undirected	protein_coding	protein_coding
CXCL13	RNASE6	0.132124	undirected	protein_coding	protein_coding
CXCL13	SAMSN1	0.179768	undirected	protein_coding	protein_coding
CXCL13	GIMAP7	0.137684	undirected	protein_coding	protein_coding
CXCL13	WAS	0.327899	undirected	protein_coding	protein_coding
CXCL13	SLAMF1	0.266903	undirected	protein_coding	protein_coding
CXCL13	PTPN7	0.218173	undirected	protein_coding	protein_coding
CXCL13	LAIR1	0.148396	undirected	protein_coding	protein_coding
CXCL13	DOCK10	0.243484	undirected	protein_coding	protein_coding
CXCL13	CYTIP	0.137287	undirected	protein_coding	protein_coding
CXCL13	CXorf21	0.161503	undirected	protein_coding	protein_coding
CXCL13	CD6	0.233934	undirected	protein_coding	protein_coding
CXCL13	CD1D	0.189038	undirected	protein_coding	protein_coding
CXCL13	LAPTM5	0.167915	undirected	protein_coding	protein_coding
CXCL13	GPR183	0.104695	undirected	protein_coding	protein_coding
CXCL13	MIR155HG	0.131409	undirected	protein_coding	long_non_coding
CXCL13	ARHGAP9	0.32574	undirected	protein_coding	protein_coding
CXCL13	GRAP2	0.173039	undirected	protein_coding	protein_coding
CXCL13	CD72	0.120709	undirected	protein_coding	protein_coding
CXCL13	CORO1A	0.269588	undirected	protein_coding	protein_coding
CXCL13	MYO1F	0.181827	undirected	protein_coding	protein_coding
CXCL13	RASSF2	0.144284	undirected	protein_coding	protein_coding
CXCL13	HCLS1	0.296685	undirected	protein_coding	protein_coding
CXCL13	C10orf128	0.173367	undirected	protein_coding	protein_coding
CXCL13	DOK2	0.152989	undirected	protein_coding	protein_coding
CXCL13	CD247	0.218391	undirected	protein_coding	protein_coding
CXCL13	RCSD1	0.296058	undirected	protein_coding	protein_coding
CXCL13	SLFN12L	0.120739	undirected	protein_coding	protein_coding
CXCL13	CAMK4	0.141822	undirected	protein_coding	protein_coding
CXCL13	RUNX3	0.125079	undirected	protein_coding	protein_coding
CXCL13	SPI1	0.119162	undirected	protein_coding	protein_coding
CXCL13	ARHGAP15	0.263355	undirected	protein_coding	protein_coding
CXCL13	CD4	0.173512	undirected	protein_coding	protein_coding
CXCL13	EVI2A	0.221882	undirected	protein_coding	protein_coding
CXCL13	CYTH4	0.247899	undirected	protein_coding	protein_coding
CXCL13	CXCR4	0.11111	undirected	protein_coding	protein_coding
CXCL13	CD226	0.198831	undirected	protein_coding	protein_coding
CXCL13	GIMAP6	0.165005	undirected	protein_coding	protein_coding
CXCL13	FAM49A	0.157022	undirected	protein_coding	protein_coding
CXCL13	LINC00926	0.101426	undirected	protein_coding	long_non_coding
CXCL13	RASAL3	0.342758	undirected	protein_coding	protein_coding
CXCL13	GPR132	0.102723	undirected	protein_coding	protein_coding
CXCL13	IL12RB1	0.20923	undirected	protein_coding	protein_coding
CXCL13	FOXP3	0.106081	undirected	protein_coding	protein_coding
CXCL13	CLEC2D	0.260884	undirected	protein_coding	protein_coding
CXCL13	LCP2	0.19725	undirected	protein_coding	protein_coding
CXCL13	GIMAP1	0.157537	undirected	protein_coding	protein_coding
CXCL13	ARHGEF6	0.210653	undirected	protein_coding	protein_coding
CXCL13	RIPOR2	0.136196	undirected	protein_coding	protein_coding
CXCL13	MILR1	0.108431	undirected	protein_coding	protein_coding
CXCL13	TLR6	0.169064	undirected	protein_coding	protein_coding
CXCL13	APOBEC3G	0.137731	undirected	protein_coding	protein_coding
CXCL13	GNGT2	0.124996	undirected	protein_coding	protein_coding
CXCL13	ZC3H12D	0.13026	undirected	protein_coding	protein_coding
CXCL13	MYO1G	0.277009	undirected	protein_coding	protein_coding
CXCL13	SFMBT2	0.13354	undirected	protein_coding	protein_coding
CXCL13	CYFIP2	0.10657	undirected	protein_coding	protein_coding
CXCL13	GIMAP4	0.151341	undirected	protein_coding	protein_coding
CXCL13	GP1BA	0.128974	undirected	protein_coding	protein_coding
CXCL13	FYB1	0.205295	undirected	protein_coding	protein_coding
CXCL13	PARVG	0.237756	undirected	protein_coding	protein_coding
CXCL13	IPCEF1	0.128501	undirected	protein_coding	protein_coding
CXCL13	DOCK8	0.216919	undirected	protein_coding	protein_coding
CXCL13	NLRC3	0.279544	undirected	protein_coding	protein_coding
CXCL13	GIMAP8	0.123667	undirected	protein_coding	protein_coding
CXCL13	FGD2	0.218116	undirected	protein_coding	protein_coding
CXCL13	GAB3	0.179923	undirected	protein_coding	protein_coding
CXCL13	ARHGAP25	0.314181	undirected	protein_coding	protein_coding
CXCL13	FAM78A	0.200238	undirected	protein_coding	protein_coding
CXCL13	PCED1B-AS1	0.245863	undirected	protein_coding	long_non_coding
CXCL13	BIN2	0.298678	undirected	protein_coding	protein_coding
CXCL13	RASGRP1	0.104925	undirected	protein_coding	protein_coding
CXCL13	VAV1	0.121184	undirected	protein_coding	protein_coding
CXCL13	SRGN	0.157822	undirected	protein_coding	protein_coding
CXCL13	STX11	0.101828	undirected	protein_coding	protein_coding
CXCL13	TNFAIP8L2	0.181397	undirected	protein_coding	protein_coding
CXCL13	ARHGAP30	0.238665	undirected	protein_coding	protein_coding
CXCL13	TSPOAP1-AS1	0.116463	undirected	protein_coding	long_non_coding
CXCL13	PTPN22	0.114573	undirected	protein_coding	protein_coding
CXCL13	VCAM1	0.100357	undirected	protein_coding	protein_coding
CXCL13	STAT4	0.180003	undirected	protein_coding	protein_coding
CXCL13	APOBEC3D	0.110785	undirected	protein_coding	protein_coding
CXCL13	POU2F2	0.122143	undirected	protein_coding	protein_coding
CXCL13	NRROS	0.154765	undirected	protein_coding	protein_coding
CXCL13	SNAI3	0.110028	undirected	protein_coding	protein_coding
CXCL13	JAK3	0.324879	undirected	protein_coding	protein_coding
CXCL13	2021-09-01	0.231488	undirected	protein_coding	protein_coding
CXCL13	LIMD2	0.113393	undirected	protein_coding	protein_coding
CXCL13	WIPF1	0.240191	undirected	protein_coding	protein_coding
CXCL13	KMO	0.116424	undirected	protein_coding	protein_coding
CXCL13	TMC8	0.14938	undirected	protein_coding	protein_coding
CXCL13	LSP1	0.194894	undirected	protein_coding	protein_coding
CXCL13	HVCN1	0.215319	undirected	protein_coding	protein_coding
CXCL13	GMFG	0.181779	undirected	protein_coding	protein_coding
CXCL13	ACAP1	0.264113	undirected	protein_coding	protein_coding
CXCL13	FLI1	0.209097	undirected	protein_coding	protein_coding
CXCL13	PIK3CD	0.177081	undirected	protein_coding	protein_coding
CXCL13	ANKRD44	0.230541	undirected	protein_coding	protein_coding
CXCL13	EVL	0.119454	undirected	protein_coding	protein_coding
CXCL13	PSTPIP1	0.147735	undirected	protein_coding	protein_coding
CXCL13	GPSM3	0.103806	undirected	protein_coding	protein_coding
CXCL13	AC008105.3	0.103048	undirected	protein_coding	long_non_coding
CXCL13	LAT2	0.109855	undirected	protein_coding	protein_coding
CXCL13	AC009950.1	0.101326	undirected	protein_coding	long_non_coding
CXCL13	ST8SIA4	0.189022	undirected	protein_coding	protein_coding
CXCL13	ARHGDIB	0.21585	undirected	protein_coding	protein_coding
CXCL13	DOK3	0.121243	undirected	protein_coding	protein_coding
CXCL13	PLCG2	0.107798	undirected	protein_coding	protein_coding
CXCL13	GNG2	0.127281	undirected	protein_coding	protein_coding
CXCL13	FMNL1	0.253506	undirected	protein_coding	protein_coding
CXCL13	TRANK1	0.116877	undirected	protein_coding	protein_coding
CXCL13	FGD3	0.1262	undirected	protein_coding	protein_coding
FCRLA	SPIB	0.163289	undirected	protein_coding	protein_coding
FCRLA	FCRL3	0.169738	undirected	protein_coding	protein_coding
FCRLA	KCNA3	0.173481	undirected	protein_coding	protein_coding
FCRLA	CD22	0.178812	undirected	protein_coding	protein_coding
FCRLA	CCR2	0.110489	undirected	protein_coding	protein_coding
FCRLA	GZMK	0.117494	undirected	protein_coding	protein_coding
FCRLA	TLR10	0.168106	undirected	protein_coding	protein_coding
FCRLA	CR1	0.178834	undirected	protein_coding	protein_coding
FCRLA	TRAT1	0.157052	undirected	protein_coding	protein_coding
FCRLA	PLD4	0.108975	undirected	protein_coding	protein_coding
FCRLA	CD19	0.181351	undirected	protein_coding	protein_coding
FCRLA	CD1C	0.14423	undirected	protein_coding	protein_coding
FCRLA	P2RY10	0.197708	undirected	protein_coding	protein_coding
FCRLA	CCR7	0.165777	undirected	protein_coding	protein_coding
FCRLA	LINC00861	0.176587	undirected	protein_coding	long_non_coding
FCRLA	MADCAM1	0.104755	undirected	protein_coding	protein_coding
FCRLA	SH2D1A	0.139289	undirected	protein_coding	protein_coding
FCRLA	THEMIS	0.106038	undirected	protein_coding	protein_coding
FCRLA	LY9	0.211771	undirected	protein_coding	protein_coding
FCRLA	AL365361.1	0.182414	undirected	protein_coding	long_non_coding
FCRLA	NUGGC	0.12803	undirected	protein_coding	protein_coding
FCRLA	CD79B	0.215627	undirected	protein_coding	protein_coding
FCRLA	TLR7	0.115562	undirected	protein_coding	protein_coding
FCRLA	GAPT	0.139224	undirected	protein_coding	protein_coding
FCRLA	ZNF831	0.17933	undirected	protein_coding	protein_coding
FCRLA	ICAM3	0.119987	undirected	protein_coding	protein_coding
FCRLA	LAX1	0.153352	undirected	protein_coding	protein_coding
FCRLA	CD27	0.176588	undirected	protein_coding	protein_coding
FCRLA	TNFRSF13C	0.191209	undirected	protein_coding	protein_coding
FCRLA	P2RX5	0.150145	undirected	protein_coding	protein_coding
FCRLA	PRKCB	0.162623	undirected	protein_coding	protein_coding
FCRLA	NCF1B	0.192119	undirected	protein_coding	pseudogene
FCRLA	NAPSB	0.151601	undirected	protein_coding	pseudogene
FCRLA	SLAMF6	0.182522	undirected	protein_coding	protein_coding
FCRLA	WDFY4	0.203557	undirected	protein_coding	protein_coding
FCRLA	IL24	0.114851	undirected	protein_coding	protein_coding
FCRLA	CCR4	0.142119	undirected	protein_coding	protein_coding
FCRLA	HLA-DOB	0.118638	undirected	protein_coding	protein_coding
FCRLA	LTB	0.12829	undirected	protein_coding	protein_coding
FCRLA	TRBV28	0.140387	undirected	protein_coding	TR
FCRLA	PIK3CG	0.172937	undirected	protein_coding	protein_coding
FCRLA	ITK	0.196566	undirected	protein_coding	protein_coding
FCRLA	NCF1	0.192418	undirected	protein_coding	protein_coding
FCRLA	CD2	0.119541	undirected	protein_coding	protein_coding
FCRLA	TIGIT	0.119499	undirected	protein_coding	protein_coding
FCRLA	CD40LG	0.120106	undirected	protein_coding	protein_coding
FCRLA	SIT1	0.125217	undirected	protein_coding	protein_coding
FCRLA	PLEK	0.103353	undirected	protein_coding	protein_coding
FCRLA	MPEG1	0.138567	undirected	protein_coding	protein_coding
FCRLA	CD84	0.138027	undirected	protein_coding	protein_coding
FCRLA	BANK1	0.13917	undirected	protein_coding	protein_coding
FCRLA	CD3E	0.151989	undirected	protein_coding	protein_coding
FCRLA	CYBB	0.102564	undirected	protein_coding	protein_coding
FCRLA	PTPRC	0.237085	undirected	protein_coding	protein_coding
FCRLA	CD48	0.238488	undirected	protein_coding	protein_coding
FCRLA	CD28	0.175258	undirected	protein_coding	protein_coding
FCRLA	SIGLEC10	0.141364	undirected	protein_coding	protein_coding
FCRLA	GVINP1	0.204123	undirected	protein_coding	pseudogene
FCRLA	C16orf54	0.123043	undirected	protein_coding	protein_coding
FCRLA	PYHIN1	0.146989	undirected	protein_coding	protein_coding
FCRLA	CSF2RB	0.165649	undirected	protein_coding	protein_coding
FCRLA	SELL	0.150969	undirected	protein_coding	protein_coding
FCRLA	CD180	0.219285	undirected	protein_coding	protein_coding
FCRLA	IL10RA	0.192986	undirected	protein_coding	protein_coding
FCRLA	TNFSF8	0.220842	undirected	protein_coding	protein_coding
FCRLA	ADA2	0.117712	undirected	protein_coding	protein_coding
FCRLA	ANKRD33B	0.149831	undirected	protein_coding	protein_coding
FCRLA	ITGAL	0.212917	undirected	protein_coding	protein_coding
FCRLA	CCL22	0.11703	undirected	protein_coding	protein_coding
FCRLA	TESPA1	0.208564	undirected	protein_coding	protein_coding
FCRLA	CD37	0.234223	undirected	protein_coding	protein_coding
FCRLA	PPP1R16B	0.196239	undirected	protein_coding	protein_coding
FCRLA	CD96	0.125224	undirected	protein_coding	protein_coding
FCRLA	BTK	0.233248	undirected	protein_coding	protein_coding
FCRLA	IL21R	0.177684	undirected	protein_coding	protein_coding
FCRLA	CARMIL2	0.138861	undirected	protein_coding	protein_coding
FCRLA	CYSLTR1	0.129441	undirected	protein_coding	protein_coding
FCRLA	CD5	0.107111	undirected	protein_coding	protein_coding
FCRLA	CD53	0.203933	undirected	protein_coding	protein_coding
FCRLA	ZAP70	0.179005	undirected	protein_coding	protein_coding
FCRLA	CD3D	0.122061	undirected	protein_coding	protein_coding
FCRLA	EBI3	0.112189	undirected	protein_coding	protein_coding
FCRLA	CD52	0.167666	undirected	protein_coding	protein_coding
FCRLA	LINC00426	0.137203	undirected	protein_coding	long_non_coding
FCRLA	LY86	0.116826	undirected	protein_coding	protein_coding
FCRLA	SCIMP	0.22768	undirected	protein_coding	protein_coding
FCRLA	SPOCK2	0.11441	undirected	protein_coding	protein_coding
FCRLA	TRBC2	0.145925	undirected	protein_coding	TR
FCRLA	TAGAP	0.211507	undirected	protein_coding	protein_coding
FCRLA	TRAF3IP3	0.261778	undirected	protein_coding	protein_coding
FCRLA	NCF1C	0.144383	undirected	protein_coding	pseudogene
FCRLA	SASH3	0.265865	undirected	protein_coding	protein_coding
FCRLA	IKZF1	0.25444	undirected	protein_coding	protein_coding
FCRLA	IL16	0.268417	undirected	protein_coding	protein_coding
FCRLA	GIMAP5	0.187216	undirected	protein_coding	protein_coding
FCRLA	DOCK2	0.227724	undirected	protein_coding	protein_coding
FCRLA	SP140	0.145691	undirected	protein_coding	protein_coding
FCRLA	CD69	0.134605	undirected	protein_coding	protein_coding
FCRLA	SPN	0.172398	undirected	protein_coding	protein_coding
FCRLA	KLHL6	0.219583	undirected	protein_coding	protein_coding
FCRLA	NCKAP1L	0.233806	undirected	protein_coding	protein_coding
FCRLA	MAP4K1	0.240748	undirected	protein_coding	protein_coding
FCRLA	SUSD3	0.10627	undirected	protein_coding	protein_coding
FCRLA	TRG-AS1	0.133002	undirected	protein_coding	long_non_coding
FCRLA	TRAC	0.140608	undirected	protein_coding	TR
FCRLA	IL7R	0.116663	undirected	protein_coding	protein_coding
FCRLA	EVI2B	0.225178	undirected	protein_coding	protein_coding
FCRLA	S1PR4	0.182353	undirected	protein_coding	protein_coding
FCRLA	P2RY8	0.213306	undirected	protein_coding	protein_coding
FCRLA	LCP1	0.190001	undirected	protein_coding	protein_coding
FCRLA	RASGRP2	0.152587	undirected	protein_coding	protein_coding
FCRLA	RHOH	0.25064	undirected	protein_coding	protein_coding
FCRLA	PARP15	0.147255	undirected	protein_coding	protein_coding
FCRLA	SLA	0.183618	undirected	protein_coding	protein_coding
FCRLA	TMEM156	0.184699	undirected	protein_coding	protein_coding
FCRLA	CD3G	0.132035	undirected	protein_coding	protein_coding
FCRLA	PIK3R5	0.145364	undirected	protein_coding	protein_coding
FCRLA	LRMP	0.162426	undirected	protein_coding	protein_coding
FCRLA	GPR65	0.121394	undirected	protein_coding	protein_coding
FCRLA	ITGA4	0.129531	undirected	protein_coding	protein_coding
FCRLA	SNX20	0.139782	undirected	protein_coding	protein_coding
FCRLA	FCMR	0.180722	undirected	protein_coding	protein_coding
FCRLA	LILRB1	0.140882	undirected	protein_coding	protein_coding
FCRLA	TBC1D10C	0.218646	undirected	protein_coding	protein_coding
FCRLA	SAMSN1	0.114693	undirected	protein_coding	protein_coding
FCRLA	GIMAP7	0.105409	undirected	protein_coding	protein_coding
FCRLA	WAS	0.226748	undirected	protein_coding	protein_coding
FCRLA	SLAMF1	0.190693	undirected	protein_coding	protein_coding
FCRLA	PTPN7	0.142472	undirected	protein_coding	protein_coding
FCRLA	DOCK10	0.177926	undirected	protein_coding	protein_coding
FCRLA	CYTIP	0.104181	undirected	protein_coding	protein_coding
FCRLA	CXorf21	0.118555	undirected	protein_coding	protein_coding
FCRLA	CD6	0.144528	undirected	protein_coding	protein_coding
FCRLA	CD1D	0.185836	undirected	protein_coding	protein_coding
FCRLA	LAPTM5	0.103649	undirected	protein_coding	protein_coding
FCRLA	ARHGAP9	0.227286	undirected	protein_coding	protein_coding
FCRLA	GRAP2	0.11001	undirected	protein_coding	protein_coding
FCRLA	CD72	0.107928	undirected	protein_coding	protein_coding
FCRLA	CORO1A	0.196929	undirected	protein_coding	protein_coding
FCRLA	MYO1F	0.11602	undirected	protein_coding	protein_coding
FCRLA	RASSF2	0.130877	undirected	protein_coding	protein_coding
FCRLA	HCLS1	0.214621	undirected	protein_coding	protein_coding
FCRLA	C10orf128	0.146665	undirected	protein_coding	protein_coding
FCRLA	CD247	0.125156	undirected	protein_coding	protein_coding
FCRLA	RCSD1	0.24575	undirected	protein_coding	protein_coding
FCRLA	CAMK4	0.115512	undirected	protein_coding	protein_coding
FCRLA	ARHGAP15	0.20612	undirected	protein_coding	protein_coding
FCRLA	CD4	0.102462	undirected	protein_coding	protein_coding
FCRLA	EVI2A	0.151972	undirected	protein_coding	protein_coding
FCRLA	CYTH4	0.166491	undirected	protein_coding	protein_coding
FCRLA	CD226	0.119205	undirected	protein_coding	protein_coding
FCRLA	GIMAP6	0.121489	undirected	protein_coding	protein_coding
FCRLA	FAM49A	0.137528	undirected	protein_coding	protein_coding
FCRLA	LINC00926	0.171445	undirected	protein_coding	long_non_coding
FCRLA	RASAL3	0.243052	undirected	protein_coding	protein_coding
FCRLA	IL12RB1	0.124595	undirected	protein_coding	protein_coding
FCRLA	CLEC2D	0.18609	undirected	protein_coding	protein_coding
FCRLA	LCP2	0.112905	undirected	protein_coding	protein_coding
FCRLA	GIMAP1	0.133245	undirected	protein_coding	protein_coding
FCRLA	ARHGEF6	0.168861	undirected	protein_coding	protein_coding
FCRLA	RIPOR2	0.140019	undirected	protein_coding	protein_coding
FCRLA	TLR6	0.147197	undirected	protein_coding	protein_coding
FCRLA	ZC3H12D	0.117297	undirected	protein_coding	protein_coding
FCRLA	MYO1G	0.192267	undirected	protein_coding	protein_coding
FCRLA	SFMBT2	0.101308	undirected	protein_coding	protein_coding
FCRLA	CYFIP2	0.108572	undirected	protein_coding	protein_coding
FCRLA	GP1BA	0.148019	undirected	protein_coding	protein_coding
FCRLA	FYB1	0.136571	undirected	protein_coding	protein_coding
FCRLA	PARVG	0.178984	undirected	protein_coding	protein_coding
FCRLA	IPCEF1	0.118694	undirected	protein_coding	protein_coding
FCRLA	DOCK8	0.157393	undirected	protein_coding	protein_coding
FCRLA	NLRC3	0.190082	undirected	protein_coding	protein_coding
FCRLA	FGD2	0.187674	undirected	protein_coding	protein_coding
FCRLA	GAB3	0.141257	undirected	protein_coding	protein_coding
FCRLA	ARHGAP25	0.233393	undirected	protein_coding	protein_coding
FCRLA	FAM78A	0.13252	undirected	protein_coding	protein_coding
FCRLA	PCED1B-AS1	0.18382	undirected	protein_coding	long_non_coding
FCRLA	BIN2	0.190251	undirected	protein_coding	protein_coding
FCRLA	SRGN	0.101396	undirected	protein_coding	protein_coding
FCRLA	TNFAIP8L2	0.116719	undirected	protein_coding	protein_coding
FCRLA	ARHGAP30	0.163183	undirected	protein_coding	protein_coding
FCRLA	STAT4	0.107799	undirected	protein_coding	protein_coding
FCRLA	POU2F2	0.1343	undirected	protein_coding	protein_coding
FCRLA	NRROS	0.11491	undirected	protein_coding	protein_coding
FCRLA	JAK3	0.232952	undirected	protein_coding	protein_coding
FCRLA	2021-09-01	0.170333	undirected	protein_coding	protein_coding
FCRLA	LIMD2	0.106613	undirected	protein_coding	protein_coding
FCRLA	WIPF1	0.182789	undirected	protein_coding	protein_coding
FCRLA	KMO	0.1019	undirected	protein_coding	protein_coding
FCRLA	TMC8	0.113623	undirected	protein_coding	protein_coding
FCRLA	LSP1	0.138624	undirected	protein_coding	protein_coding
FCRLA	HVCN1	0.185203	undirected	protein_coding	protein_coding
FCRLA	GMFG	0.13287	undirected	protein_coding	protein_coding
FCRLA	ACAP1	0.203484	undirected	protein_coding	protein_coding
FCRLA	FLI1	0.178691	undirected	protein_coding	protein_coding
FCRLA	PIK3CD	0.129561	undirected	protein_coding	protein_coding
FCRLA	ANKRD44	0.192305	undirected	protein_coding	protein_coding
FCRLA	EVL	0.100416	undirected	protein_coding	protein_coding
FCRLA	RBP5	0.121561	undirected	protein_coding	protein_coding
FCRLA	CFP	0.100792	undirected	protein_coding	protein_coding
FCRLA	ST8SIA4	0.125853	undirected	protein_coding	protein_coding
FCRLA	ARHGDIB	0.156867	undirected	protein_coding	protein_coding
FCRLA	PLCG2	0.132238	undirected	protein_coding	protein_coding
FCRLA	GNG2	0.105669	undirected	protein_coding	protein_coding
FCRLA	LYL1	0.101212	undirected	protein_coding	protein_coding
FCRLA	FMNL1	0.186486	undirected	protein_coding	protein_coding
HOXA11	HOXA9	0.155028	undirected	protein_coding	protein_coding
HOXA11	HOXA10	0.141274	undirected	protein_coding	protein_coding
HLA-DQA2	HLA-DQB2	0.102892	undirected	protein_coding	protein_coding
HLA-DQA2	HLA-DRB6	0.154421	undirected	protein_coding	pseudogene
HLA-DQA2	PTPRC	0.104604	undirected	protein_coding	protein_coding
HLA-DQA2	CD48	0.101902	undirected	protein_coding	protein_coding
HLA-DQA2	ITGAL	0.10065	undirected	protein_coding	protein_coding
HLA-DQA2	CD53	0.107645	undirected	protein_coding	protein_coding
HLA-DQA2	SASH3	0.103858	undirected	protein_coding	protein_coding
HLA-DQA2	WAS	0.106886	undirected	protein_coding	protein_coding
CXCL9	OR2I1P	0.10356	undirected	protein_coding	pseudogene
CXCL9	UBD	0.112119	undirected	protein_coding	protein_coding
CXCL9	CXCL10	0.133575	undirected	protein_coding	protein_coding
CXCL9	IDO1	0.110337	undirected	protein_coding	protein_coding
CXCL9	CCR2	0.101515	undirected	protein_coding	protein_coding
CXCL9	GZMK	0.135371	undirected	protein_coding	protein_coding
CXCL9	CXCL11	0.136938	undirected	protein_coding	protein_coding
CXCL9	TRAT1	0.169696	undirected	protein_coding	protein_coding
CXCL9	TLR8	0.138014	undirected	protein_coding	protein_coding
CXCL9	P2RY10	0.159776	undirected	protein_coding	protein_coding
CXCL9	GZMH	0.122769	undirected	protein_coding	protein_coding
CXCL9	ZNF683	0.108523	undirected	protein_coding	protein_coding
CXCL9	CD8A	0.202825	undirected	protein_coding	protein_coding
CXCL9	SH2D1A	0.189579	undirected	protein_coding	protein_coding
CXCL9	GBP5	0.156428	undirected	protein_coding	protein_coding
CXCL9	GZMB	0.107915	undirected	protein_coding	protein_coding
CXCL9	SLAMF7	0.114449	undirected	protein_coding	protein_coding
CXCL9	THEMIS	0.192539	undirected	protein_coding	protein_coding
CXCL9	TLR7	0.123909	undirected	protein_coding	protein_coding
CXCL9	ZNF831	0.112276	undirected	protein_coding	protein_coding
CXCL9	GZMA	0.119278	undirected	protein_coding	protein_coding
CXCL9	NKG7	0.178936	undirected	protein_coding	protein_coding
CXCL9	SIRPG	0.16244	undirected	protein_coding	protein_coding
CXCL9	AOAH	0.118974	undirected	protein_coding	protein_coding
CXCL9	NCF1B	0.101919	undirected	protein_coding	pseudogene
CXCL9	SLAMF6	0.137158	undirected	protein_coding	protein_coding
CXCL9	TRBV28	0.190731	undirected	protein_coding	TR
CXCL9	ICOS	0.129986	undirected	protein_coding	protein_coding
CXCL9	ITK	0.207134	undirected	protein_coding	protein_coding
CXCL9	CCL5	0.167181	undirected	protein_coding	protein_coding
CXCL9	CCL4	0.101803	undirected	protein_coding	protein_coding
CXCL9	NCF1	0.137796	undirected	protein_coding	protein_coding
CXCL9	CD2	0.23982	undirected	protein_coding	protein_coding
CXCL9	TIGIT	0.170094	undirected	protein_coding	protein_coding
CXCL9	SIT1	0.105841	undirected	protein_coding	protein_coding
CXCL9	PLEK	0.151421	undirected	protein_coding	protein_coding
CXCL9	MPEG1	0.166835	undirected	protein_coding	protein_coding
CXCL9	CD84	0.188992	undirected	protein_coding	protein_coding
CXCL9	CD3E	0.233806	undirected	protein_coding	protein_coding
CXCL9	CYBB	0.201629	undirected	protein_coding	protein_coding
CXCL9	PTPRC	0.217121	undirected	protein_coding	protein_coding
CXCL9	CD48	0.20159	undirected	protein_coding	protein_coding
CXCL9	SIGLEC10	0.16298	undirected	protein_coding	protein_coding
CXCL9	GVINP1	0.146077	undirected	protein_coding	pseudogene
CXCL9	C1QB	0.131383	undirected	protein_coding	protein_coding
CXCL9	ITGB2	0.169457	undirected	protein_coding	protein_coding
CXCL9	TRGC2	0.128982	undirected	protein_coding	TR
CXCL9	PYHIN1	0.181036	undirected	protein_coding	protein_coding
CXCL9	CD180	0.106311	undirected	protein_coding	protein_coding
CXCL9	IL10RA	0.1872	undirected	protein_coding	protein_coding
CXCL9	PRF1	0.145532	undirected	protein_coding	protein_coding
CXCL9	TNFSF8	0.137274	undirected	protein_coding	protein_coding
CXCL9	ADA2	0.16924	undirected	protein_coding	protein_coding
CXCL9	GPR171	0.142635	undirected	protein_coding	protein_coding
CXCL9	ITGAL	0.210557	undirected	protein_coding	protein_coding
CXCL9	TESPA1	0.109798	undirected	protein_coding	protein_coding
CXCL9	CSF1R	0.117192	undirected	protein_coding	protein_coding
CXCL9	CD37	0.117392	undirected	protein_coding	protein_coding
CXCL9	CD96	0.224155	undirected	protein_coding	protein_coding
CXCL9	CCR5	0.234063	undirected	protein_coding	protein_coding
CXCL9	BTK	0.13211	undirected	protein_coding	protein_coding
CXCL9	IL21R	0.189812	undirected	protein_coding	protein_coding
CXCL9	SLAMF8	0.165179	undirected	protein_coding	protein_coding
CXCL9	CXCR6	0.158407	undirected	protein_coding	protein_coding
CXCL9	LILRB4	0.131427	undirected	protein_coding	protein_coding
CXCL9	CD53	0.225987	undirected	protein_coding	protein_coding
CXCL9	ZAP70	0.172557	undirected	protein_coding	protein_coding
CXCL9	FPR3	0.124791	undirected	protein_coding	protein_coding
CXCL9	C3AR1	0.137559	undirected	protein_coding	protein_coding
CXCL9	CD3D	0.218842	undirected	protein_coding	protein_coding
CXCL9	CD52	0.138572	undirected	protein_coding	protein_coding
CXCL9	SCIMP	0.159268	undirected	protein_coding	protein_coding
CXCL9	TRBC2	0.199003	undirected	protein_coding	TR
CXCL9	IL2RB	0.188897	undirected	protein_coding	protein_coding
CXCL9	TAGAP	0.13833	undirected	protein_coding	protein_coding
CXCL9	TRAF3IP3	0.181739	undirected	protein_coding	protein_coding
CXCL9	SASH3	0.191252	undirected	protein_coding	protein_coding
CXCL9	IKZF1	0.18221	undirected	protein_coding	protein_coding
CXCL9	IL16	0.13368	undirected	protein_coding	protein_coding
CXCL9	GIMAP5	0.10051	undirected	protein_coding	protein_coding
CXCL9	SLA2	0.146884	undirected	protein_coding	protein_coding
CXCL9	GBP4	0.11401	undirected	protein_coding	protein_coding
CXCL9	DOCK2	0.183688	undirected	protein_coding	protein_coding
CXCL9	C1QC	0.134064	undirected	protein_coding	protein_coding
CXCL9	CD69	0.120127	undirected	protein_coding	protein_coding
CXCL9	SPN	0.208893	undirected	protein_coding	protein_coding
CXCL9	CST7	0.149111	undirected	protein_coding	protein_coding
CXCL9	HCST	0.146352	undirected	protein_coding	protein_coding
CXCL9	KLHL6	0.105653	undirected	protein_coding	protein_coding
CXCL9	NCKAP1L	0.184913	undirected	protein_coding	protein_coding
CXCL9	MAP4K1	0.172433	undirected	protein_coding	protein_coding
CXCL9	UBASH3A	0.13365	undirected	protein_coding	protein_coding
CXCL9	C1QA	0.147048	undirected	protein_coding	protein_coding
CXCL9	TRG-AS1	0.172745	undirected	protein_coding	long_non_coding
CXCL9	TRAC	0.225336	undirected	protein_coding	TR
CXCL9	EVI2B	0.193856	undirected	protein_coding	protein_coding
CXCL9	LCP1	0.191474	undirected	protein_coding	protein_coding
CXCL9	RHOH	0.137042	undirected	protein_coding	protein_coding
CXCL9	RGS18	0.105393	undirected	protein_coding	protein_coding
CXCL9	PDCD1LG2	0.167213	undirected	protein_coding	protein_coding
CXCL9	SLA	0.18259	undirected	protein_coding	protein_coding
CXCL9	MS4A6A	0.149325	undirected	protein_coding	protein_coding
CXCL9	CMKLR1	0.129953	undirected	protein_coding	protein_coding
CXCL9	IL2RA	0.103408	undirected	protein_coding	protein_coding
CXCL9	CD3G	0.227186	undirected	protein_coding	protein_coding
CXCL9	PIK3R5	0.12873	undirected	protein_coding	protein_coding
CXCL9	GPR65	0.171935	undirected	protein_coding	protein_coding
CXCL9	ITGA4	0.112583	undirected	protein_coding	protein_coding
CXCL9	CD86	0.185253	undirected	protein_coding	protein_coding
CXCL9	SNX20	0.155211	undirected	protein_coding	protein_coding
CXCL9	LILRB1	0.155491	undirected	protein_coding	protein_coding
CXCL9	TBC1D10C	0.186837	undirected	protein_coding	protein_coding
CXCL9	RNASE6	0.105521	undirected	protein_coding	protein_coding
CXCL9	SAMSN1	0.152117	undirected	protein_coding	protein_coding
CXCL9	MS4A7	0.101154	undirected	protein_coding	protein_coding
CXCL9	WAS	0.205461	undirected	protein_coding	protein_coding
CXCL9	SLAMF1	0.141756	undirected	protein_coding	protein_coding
CXCL9	PTPN7	0.140981	undirected	protein_coding	protein_coding
CXCL9	LAIR1	0.169176	undirected	protein_coding	protein_coding
CXCL9	DOCK10	0.140594	undirected	protein_coding	protein_coding
CXCL9	HCK	0.110058	undirected	protein_coding	protein_coding
CXCL9	CD6	0.164839	undirected	protein_coding	protein_coding
CXCL9	LAPTM5	0.164693	undirected	protein_coding	protein_coding
CXCL9	IGSF6	0.131214	undirected	protein_coding	protein_coding
CXCL9	AIF1	0.155726	undirected	protein_coding	protein_coding
CXCL9	ARHGAP9	0.183967	undirected	protein_coding	protein_coding
CXCL9	GRAP2	0.119549	undirected	protein_coding	protein_coding
CXCL9	HAVCR2	0.1653	undirected	protein_coding	protein_coding
CXCL9	CORO1A	0.14292	undirected	protein_coding	protein_coding
CXCL9	MYO1F	0.148697	undirected	protein_coding	protein_coding
CXCL9	HCLS1	0.170153	undirected	protein_coding	protein_coding
CXCL9	DOK2	0.192601	undirected	protein_coding	protein_coding
CXCL9	TNFSF13B	0.118401	undirected	protein_coding	protein_coding
CXCL9	CD247	0.179945	undirected	protein_coding	protein_coding
CXCL9	RCSD1	0.122088	undirected	protein_coding	protein_coding
CXCL9	SPI1	0.150307	undirected	protein_coding	protein_coding
CXCL9	ARHGAP15	0.13321	undirected	protein_coding	protein_coding
CXCL9	CD4	0.199472	undirected	protein_coding	protein_coding
CXCL9	EVI2A	0.157843	undirected	protein_coding	protein_coding
CXCL9	CYTH4	0.173567	undirected	protein_coding	protein_coding
CXCL9	CD226	0.155376	undirected	protein_coding	protein_coding
CXCL9	GIMAP6	0.10989	undirected	protein_coding	protein_coding
CXCL9	RASAL3	0.187613	undirected	protein_coding	protein_coding
CXCL9	IL12RB1	0.179601	undirected	protein_coding	protein_coding
CXCL9	CLEC2D	0.138813	undirected	protein_coding	protein_coding
CXCL9	LCP2	0.208472	undirected	protein_coding	protein_coding
CXCL9	ARHGEF6	0.104327	undirected	protein_coding	protein_coding
CXCL9	APOBEC3G	0.185197	undirected	protein_coding	protein_coding
CXCL9	GNGT2	0.13122	undirected	protein_coding	protein_coding
CXCL9	MYO1G	0.163375	undirected	protein_coding	protein_coding
CXCL9	GIMAP4	0.136419	undirected	protein_coding	protein_coding
CXCL9	FYB1	0.154106	undirected	protein_coding	protein_coding
CXCL9	PARVG	0.138373	undirected	protein_coding	protein_coding
CXCL9	DOCK8	0.113223	undirected	protein_coding	protein_coding
CXCL9	NLRC3	0.156088	undirected	protein_coding	protein_coding
CXCL9	CLEC4A	0.108512	undirected	protein_coding	protein_coding
CXCL9	GAB3	0.100266	undirected	protein_coding	protein_coding
CXCL9	ARHGAP25	0.162748	undirected	protein_coding	protein_coding
CXCL9	FAM78A	0.124039	undirected	protein_coding	protein_coding
CXCL9	LRRC25	0.102769	undirected	protein_coding	protein_coding
CXCL9	PCED1B-AS1	0.132712	undirected	protein_coding	long_non_coding
CXCL9	BIN2	0.215184	undirected	protein_coding	protein_coding
CXCL9	SRGN	0.142656	undirected	protein_coding	protein_coding
CXCL9	TNFAIP8L2	0.160857	undirected	protein_coding	protein_coding
CXCL9	ARHGAP30	0.142682	undirected	protein_coding	protein_coding
CXCL9	STAT4	0.151695	undirected	protein_coding	protein_coding
CXCL9	NRROS	0.108364	undirected	protein_coding	protein_coding
CXCL9	JAK3	0.175859	undirected	protein_coding	protein_coding
CXCL9	2021-09-01	0.11346	undirected	protein_coding	protein_coding
CXCL9	GBP1	0.109712	undirected	protein_coding	protein_coding
CXCL9	WIPF1	0.138116	undirected	protein_coding	protein_coding
CXCL9	LSP1	0.129887	undirected	protein_coding	protein_coding
CXCL9	GMFG	0.114456	undirected	protein_coding	protein_coding
CXCL9	ACAP1	0.118664	undirected	protein_coding	protein_coding
CXCL9	ST8SIA4	0.145691	undirected	protein_coding	protein_coding
CXCL9	ARHGDIB	0.130157	undirected	protein_coding	protein_coding
CXCL9	FMNL1	0.142681	undirected	protein_coding	protein_coding
CXCL9	STAT1	0.119132	undirected	protein_coding	protein_coding
CXCL9	IL18BP	0.118832	undirected	protein_coding	protein_coding
FCGR3B	AQP9	0.113595	undirected	protein_coding	protein_coding
FCGR3B	CXCR2	0.102597	undirected	protein_coding	protein_coding
FCGR3B	FPR2	0.158786	undirected	protein_coding	protein_coding
FCGR3B	ADGRG3	0.144604	undirected	protein_coding	protein_coding
FCGR3B	FPR1	0.134704	undirected	protein_coding	protein_coding
FCGR3B	CSF3R	0.146028	undirected	protein_coding	protein_coding
FCGR3B	MEFV	0.100854	undirected	protein_coding	protein_coding
FCGR3B	LILRA5	0.123123	undirected	protein_coding	protein_coding
FCGR3B	ADGRE2	0.103338	undirected	protein_coding	protein_coding
FCGR3B	LILRB3	0.125476	undirected	protein_coding	protein_coding
CCL18	TLR8	0.114811	undirected	protein_coding	protein_coding
CCL18	SIGLEC1	0.105906	undirected	protein_coding	protein_coding
CCL18	CD163	0.101406	undirected	protein_coding	protein_coding
CCL18	PLEK	0.115904	undirected	protein_coding	protein_coding
CCL18	MPEG1	0.106855	undirected	protein_coding	protein_coding
CCL18	CD84	0.135526	undirected	protein_coding	protein_coding
CCL18	CYBB	0.146542	undirected	protein_coding	protein_coding
CCL18	C1QB	0.143339	undirected	protein_coding	protein_coding
CCL18	ITGB2	0.1556	undirected	protein_coding	protein_coding
CCL18	IL10RA	0.104117	undirected	protein_coding	protein_coding
CCL18	ADA2	0.106118	undirected	protein_coding	protein_coding
CCL18	SIGLEC7	0.121304	undirected	protein_coding	protein_coding
CCL18	CSF1R	0.109278	undirected	protein_coding	protein_coding
CCL18	CCR5	0.101311	undirected	protein_coding	protein_coding
CCL18	SLAMF8	0.173284	undirected	protein_coding	protein_coding
CCL18	LILRB4	0.155288	undirected	protein_coding	protein_coding
CCL18	PLA2G7	0.104976	undirected	protein_coding	protein_coding
CCL18	CD53	0.12929	undirected	protein_coding	protein_coding
CCL18	FPR3	0.161397	undirected	protein_coding	protein_coding
CCL18	C3AR1	0.155912	undirected	protein_coding	protein_coding
CCL18	MS4A4A	0.115775	undirected	protein_coding	protein_coding
CCL18	LILRB2	0.115448	undirected	protein_coding	protein_coding
CCL18	C1QC	0.153397	undirected	protein_coding	protein_coding
CCL18	C1QA	0.144577	undirected	protein_coding	protein_coding
CCL18	NCF2	0.107606	undirected	protein_coding	protein_coding
CCL18	PILRA	0.104797	undirected	protein_coding	protein_coding
CCL18	PDCD1LG2	0.103592	undirected	protein_coding	protein_coding
CCL18	MS4A6A	0.110512	undirected	protein_coding	protein_coding
CCL18	CMKLR1	0.117048	undirected	protein_coding	protein_coding
CCL18	CD86	0.167099	undirected	protein_coding	protein_coding
CCL18	LILRB1	0.109149	undirected	protein_coding	protein_coding
CCL18	SAMSN1	0.104082	undirected	protein_coding	protein_coding
CCL18	MS4A7	0.102698	undirected	protein_coding	protein_coding
CCL18	WAS	0.102839	undirected	protein_coding	protein_coding
CCL18	LAIR1	0.147592	undirected	protein_coding	protein_coding
CCL18	HCK	0.139323	undirected	protein_coding	protein_coding
CCL18	LAPTM5	0.133904	undirected	protein_coding	protein_coding
CCL18	AIF1	0.126838	undirected	protein_coding	protein_coding
CCL18	HAVCR2	0.178565	undirected	protein_coding	protein_coding
CCL18	MYO1F	0.102088	undirected	protein_coding	protein_coding
CCL18	DOK2	0.149756	undirected	protein_coding	protein_coding
CCL18	SPI1	0.150617	undirected	protein_coding	protein_coding
CCL18	ITGAX	0.100479	undirected	protein_coding	protein_coding
CCL18	CD4	0.149976	undirected	protein_coding	protein_coding
CCL18	CYTH4	0.107328	undirected	protein_coding	protein_coding
CCL18	FCER1G	0.108714	undirected	protein_coding	protein_coding
CCL18	FCGR2A	0.100589	undirected	protein_coding	protein_coding
CCL18	LCP2	0.136535	undirected	protein_coding	protein_coding
CCL18	CLEC4A	0.107279	undirected	protein_coding	protein_coding
CCL18	LRRC25	0.147226	undirected	protein_coding	protein_coding
CCL18	SRGN	0.110423	undirected	protein_coding	protein_coding
CCL18	TNFAIP8L2	0.107746	undirected	protein_coding	protein_coding
OR2I1P	UBD	0.123137	undirected	pseudogene	protein_coding
OR2I1P	CXCL10	0.109908	undirected	pseudogene	protein_coding
OR2I1P	IDO1	0.109104	undirected	pseudogene	protein_coding
OR2I1P	GZMK	0.100588	undirected	pseudogene	protein_coding
OR2I1P	TRAT1	0.129825	undirected	pseudogene	protein_coding
OR2I1P	TLR8	0.118722	undirected	pseudogene	protein_coding
OR2I1P	P2RY10	0.126205	undirected	pseudogene	protein_coding
OR2I1P	CD8A	0.158416	undirected	pseudogene	protein_coding
OR2I1P	SH2D1A	0.144274	undirected	pseudogene	protein_coding
OR2I1P	GBP5	0.139216	undirected	pseudogene	protein_coding
OR2I1P	THEMIS	0.151697	undirected	pseudogene	protein_coding
OR2I1P	TLR7	0.100276	undirected	pseudogene	protein_coding
OR2I1P	NKG7	0.136853	undirected	pseudogene	protein_coding
OR2I1P	SIRPG	0.127878	undirected	pseudogene	protein_coding
OR2I1P	AOAH	0.100557	undirected	pseudogene	protein_coding
OR2I1P	SLAMF6	0.105716	undirected	pseudogene	protein_coding
OR2I1P	TRBV28	0.140182	undirected	pseudogene	TR
OR2I1P	ICOS	0.104059	undirected	pseudogene	protein_coding
OR2I1P	ITK	0.161398	undirected	pseudogene	protein_coding
OR2I1P	CCL5	0.130028	undirected	pseudogene	protein_coding
OR2I1P	NCF1	0.110996	undirected	pseudogene	protein_coding
OR2I1P	CD2	0.182423	undirected	pseudogene	protein_coding
OR2I1P	TIGIT	0.134912	undirected	pseudogene	protein_coding
OR2I1P	PLEK	0.126873	undirected	pseudogene	protein_coding
OR2I1P	MPEG1	0.140361	undirected	pseudogene	protein_coding
OR2I1P	CD84	0.156033	undirected	pseudogene	protein_coding
OR2I1P	CD3E	0.176299	undirected	pseudogene	protein_coding
OR2I1P	CYBB	0.165496	undirected	pseudogene	protein_coding
OR2I1P	PTPRC	0.175735	undirected	pseudogene	protein_coding
OR2I1P	CD48	0.156331	undirected	pseudogene	protein_coding
OR2I1P	SIGLEC10	0.134611	undirected	pseudogene	protein_coding
OR2I1P	GVINP1	0.121043	undirected	pseudogene	pseudogene
OR2I1P	C1QB	0.103383	undirected	pseudogene	protein_coding
OR2I1P	ITGB2	0.136857	undirected	pseudogene	protein_coding
OR2I1P	PYHIN1	0.141464	undirected	pseudogene	protein_coding
OR2I1P	IL10RA	0.153349	undirected	pseudogene	protein_coding
OR2I1P	PRF1	0.120038	undirected	pseudogene	protein_coding
OR2I1P	TNFSF8	0.11285	undirected	pseudogene	protein_coding
OR2I1P	ADA2	0.137809	undirected	pseudogene	protein_coding
OR2I1P	GPR171	0.11002	undirected	pseudogene	protein_coding
OR2I1P	ITGAL	0.169926	undirected	pseudogene	protein_coding
OR2I1P	CD96	0.176968	undirected	pseudogene	protein_coding
OR2I1P	CCR5	0.184441	undirected	pseudogene	protein_coding
OR2I1P	BTK	0.110405	undirected	pseudogene	protein_coding
OR2I1P	IL21R	0.15026	undirected	pseudogene	protein_coding
OR2I1P	SLAMF8	0.132084	undirected	pseudogene	protein_coding
OR2I1P	CXCR6	0.13269	undirected	pseudogene	protein_coding
OR2I1P	LILRB4	0.106654	undirected	pseudogene	protein_coding
OR2I1P	CD53	0.180725	undirected	pseudogene	protein_coding
OR2I1P	ZAP70	0.136854	undirected	pseudogene	protein_coding
OR2I1P	FPR3	0.105245	undirected	pseudogene	protein_coding
OR2I1P	C3AR1	0.108307	undirected	pseudogene	protein_coding
OR2I1P	CD3D	0.166318	undirected	pseudogene	protein_coding
OR2I1P	CD52	0.10471	undirected	pseudogene	protein_coding
OR2I1P	SCIMP	0.132371	undirected	pseudogene	protein_coding
OR2I1P	TRBC2	0.146582	undirected	pseudogene	TR
OR2I1P	IL2RB	0.154938	undirected	pseudogene	protein_coding
OR2I1P	TAGAP	0.113894	undirected	pseudogene	protein_coding
OR2I1P	TRAF3IP3	0.145249	undirected	pseudogene	protein_coding
OR2I1P	SASH3	0.155687	undirected	pseudogene	protein_coding
OR2I1P	IKZF1	0.144632	undirected	pseudogene	protein_coding
OR2I1P	IL16	0.108818	undirected	pseudogene	protein_coding
OR2I1P	SLA2	0.117083	undirected	pseudogene	protein_coding
OR2I1P	GBP4	0.116062	undirected	pseudogene	protein_coding
OR2I1P	DOCK2	0.153755	undirected	pseudogene	protein_coding
OR2I1P	C1QC	0.106286	undirected	pseudogene	protein_coding
OR2I1P	SPN	0.164018	undirected	pseudogene	protein_coding
OR2I1P	CST7	0.112842	undirected	pseudogene	protein_coding
OR2I1P	HCST	0.106682	undirected	pseudogene	protein_coding
OR2I1P	NCKAP1L	0.153252	undirected	pseudogene	protein_coding
OR2I1P	MAP4K1	0.135764	undirected	pseudogene	protein_coding
OR2I1P	UBASH3A	0.105236	undirected	pseudogene	protein_coding
OR2I1P	C1QA	0.115416	undirected	pseudogene	protein_coding
OR2I1P	TRG-AS1	0.137035	undirected	pseudogene	long_non_coding
OR2I1P	TRAC	0.168182	undirected	pseudogene	TR
OR2I1P	EVI2B	0.152296	undirected	pseudogene	protein_coding
OR2I1P	LCP1	0.156891	undirected	pseudogene	protein_coding
OR2I1P	RHOH	0.108372	undirected	pseudogene	protein_coding
OR2I1P	PDCD1LG2	0.135655	undirected	pseudogene	protein_coding
OR2I1P	SLA	0.150501	undirected	pseudogene	protein_coding
OR2I1P	MS4A6A	0.118256	undirected	pseudogene	protein_coding
OR2I1P	CMKLR1	0.112299	undirected	pseudogene	protein_coding
OR2I1P	CD3G	0.175941	undirected	pseudogene	protein_coding
OR2I1P	PIK3R5	0.109089	undirected	pseudogene	protein_coding
OR2I1P	GPR65	0.13769	undirected	pseudogene	protein_coding
OR2I1P	CD86	0.149614	undirected	pseudogene	protein_coding
OR2I1P	SNX20	0.125227	undirected	pseudogene	protein_coding
OR2I1P	LILRB1	0.127609	undirected	pseudogene	protein_coding
OR2I1P	TBC1D10C	0.144974	undirected	pseudogene	protein_coding
OR2I1P	SAMSN1	0.126742	undirected	pseudogene	protein_coding
OR2I1P	WAS	0.16335	undirected	pseudogene	protein_coding
OR2I1P	SLAMF1	0.111395	undirected	pseudogene	protein_coding
OR2I1P	PTPN7	0.109321	undirected	pseudogene	protein_coding
OR2I1P	LAIR1	0.134906	undirected	pseudogene	protein_coding
OR2I1P	DOCK10	0.118632	undirected	pseudogene	protein_coding
OR2I1P	CD6	0.130181	undirected	pseudogene	protein_coding
OR2I1P	LAPTM5	0.132185	undirected	pseudogene	protein_coding
OR2I1P	IGSF6	0.108374	undirected	pseudogene	protein_coding
OR2I1P	AIF1	0.121241	undirected	pseudogene	protein_coding
OR2I1P	ARHGAP9	0.147945	undirected	pseudogene	protein_coding
OR2I1P	HAVCR2	0.134952	undirected	pseudogene	protein_coding
OR2I1P	CORO1A	0.113813	undirected	pseudogene	protein_coding
OR2I1P	MYO1F	0.126313	undirected	pseudogene	protein_coding
OR2I1P	HCLS1	0.137828	undirected	pseudogene	protein_coding
OR2I1P	DOK2	0.154878	undirected	pseudogene	protein_coding
OR2I1P	TNFSF13B	0.100379	undirected	pseudogene	protein_coding
OR2I1P	CD247	0.141141	undirected	pseudogene	protein_coding
OR2I1P	RCSD1	0.102391	undirected	pseudogene	protein_coding
OR2I1P	SPI1	0.119435	undirected	pseudogene	protein_coding
OR2I1P	ARHGAP15	0.104837	undirected	pseudogene	protein_coding
OR2I1P	CD4	0.160245	undirected	pseudogene	protein_coding
OR2I1P	EVI2A	0.124255	undirected	pseudogene	protein_coding
OR2I1P	CYTH4	0.142545	undirected	pseudogene	protein_coding
OR2I1P	CD226	0.125704	undirected	pseudogene	protein_coding
OR2I1P	RASAL3	0.15076	undirected	pseudogene	protein_coding
OR2I1P	IL12RB1	0.149785	undirected	pseudogene	protein_coding
OR2I1P	CLEC2D	0.10954	undirected	pseudogene	protein_coding
OR2I1P	LCP2	0.16948	undirected	pseudogene	protein_coding
OR2I1P	APOBEC3G	0.1452	undirected	pseudogene	protein_coding
OR2I1P	GNGT2	0.104344	undirected	pseudogene	protein_coding
OR2I1P	MYO1G	0.132781	undirected	pseudogene	protein_coding
OR2I1P	GIMAP4	0.106989	undirected	pseudogene	protein_coding
OR2I1P	FYB1	0.12471	undirected	pseudogene	protein_coding
OR2I1P	PARVG	0.113347	undirected	pseudogene	protein_coding
OR2I1P	NLRC3	0.125356	undirected	pseudogene	protein_coding
OR2I1P	ARHGAP25	0.13056	undirected	pseudogene	protein_coding
OR2I1P	FAM78A	0.102548	undirected	pseudogene	protein_coding
OR2I1P	PCED1B-AS1	0.100499	undirected	pseudogene	long_non_coding
OR2I1P	BIN2	0.16863	undirected	pseudogene	protein_coding
OR2I1P	SRGN	0.117844	undirected	pseudogene	protein_coding
OR2I1P	TNFAIP8L2	0.131198	undirected	pseudogene	protein_coding
OR2I1P	ARHGAP30	0.11514	undirected	pseudogene	protein_coding
OR2I1P	STAT4	0.11663	undirected	pseudogene	protein_coding
OR2I1P	JAK3	0.143279	undirected	pseudogene	protein_coding
OR2I1P	GBP1	0.101994	undirected	pseudogene	protein_coding
OR2I1P	WIPF1	0.109548	undirected	pseudogene	protein_coding
OR2I1P	LSP1	0.102793	undirected	pseudogene	protein_coding
OR2I1P	ST8SIA4	0.123462	undirected	pseudogene	protein_coding
OR2I1P	ARHGDIB	0.103212	undirected	pseudogene	protein_coding
OR2I1P	FMNL1	0.113158	undirected	pseudogene	protein_coding
UBD	CXCL10	0.136733	undirected	protein_coding	protein_coding
UBD	IDO1	0.122284	undirected	protein_coding	protein_coding
UBD	CXCL11	0.122191	undirected	protein_coding	protein_coding
UBD	CD8A	0.138109	undirected	protein_coding	protein_coding
UBD	SH2D1A	0.106485	undirected	protein_coding	protein_coding
UBD	GBP5	0.135874	undirected	protein_coding	protein_coding
UBD	THEMIS	0.116071	undirected	protein_coding	protein_coding
UBD	NKG7	0.131217	undirected	protein_coding	protein_coding
UBD	TRBV28	0.100939	undirected	protein_coding	TR
UBD	ITK	0.1083	undirected	protein_coding	protein_coding
UBD	CCL5	0.125716	undirected	protein_coding	protein_coding
UBD	CD2	0.139777	undirected	protein_coding	protein_coding
UBD	CD84	0.101611	undirected	protein_coding	protein_coding
UBD	CD3E	0.129333	undirected	protein_coding	protein_coding
UBD	CYBB	0.116164	undirected	protein_coding	protein_coding
UBD	PTPRC	0.109631	undirected	protein_coding	protein_coding
UBD	PYHIN1	0.101637	undirected	protein_coding	protein_coding
UBD	PRF1	0.107763	undirected	protein_coding	protein_coding
UBD	ITGAL	0.107455	undirected	protein_coding	protein_coding
UBD	CD96	0.136121	undirected	protein_coding	protein_coding
UBD	CCR5	0.144674	undirected	protein_coding	protein_coding
UBD	IL21R	0.100473	undirected	protein_coding	protein_coding
UBD	SLAMF8	0.10758	undirected	protein_coding	protein_coding
UBD	CXCR6	0.113524	undirected	protein_coding	protein_coding
UBD	CD53	0.115648	undirected	protein_coding	protein_coding
UBD	CD3D	0.127482	undirected	protein_coding	protein_coding
UBD	TRBC2	0.107814	undirected	protein_coding	TR
UBD	IL2RB	0.120088	undirected	protein_coding	protein_coding
UBD	GBP4	0.13527	undirected	protein_coding	protein_coding
UBD	SPN	0.110941	undirected	protein_coding	protein_coding
UBD	TRAC	0.123147	undirected	protein_coding	TR
UBD	PDCD1LG2	0.104501	undirected	protein_coding	protein_coding
UBD	CD3G	0.132536	undirected	protein_coding	protein_coding
UBD	CD86	0.113286	undirected	protein_coding	protein_coding
UBD	WAS	0.101189	undirected	protein_coding	protein_coding
UBD	HAVCR2	0.108252	undirected	protein_coding	protein_coding
UBD	DOK2	0.108146	undirected	protein_coding	protein_coding
UBD	CD4	0.108739	undirected	protein_coding	protein_coding
UBD	IL12RB1	0.106661	undirected	protein_coding	protein_coding
UBD	LCP2	0.119215	undirected	protein_coding	protein_coding
UBD	APOBEC3G	0.127195	undirected	protein_coding	protein_coding
UBD	BIN2	0.111282	undirected	protein_coding	protein_coding
UBD	GBP1	0.122444	undirected	protein_coding	protein_coding
SPIB	FCRL3	0.141255	undirected	protein_coding	protein_coding
SPIB	KCNA3	0.105256	undirected	protein_coding	protein_coding
SPIB	CD22	0.16495	undirected	protein_coding	protein_coding
SPIB	TLR10	0.160008	undirected	protein_coding	protein_coding
[truncated: 72,486 more rows]
